# Supplementary material
Source: PubMed Central journal article supplement (PMC3018786)
Supplement: emboj2010268s1.pdf [file emboj2010268s1.pdf]

## SUPPLEMENTAL MATERIALS

### ***Supplemental Figure 1.***

*a.* 3% thioglycollate-elicited mouse peritoneal macrophages were infected with either Ad-GFP or Ad-FoxO1-CA at 100 M.O.I.; 48 hours post infection, cells were exposed to 100ng/ml LPS for 30 minutes and subsequently lysed for immunoblotting assays with the indicated antibodies. Relative amount of phosphorylated versus total protein levels for P65 and JNK were quantitated by NIH-Image J; and the results are shown as bar graphs (M±SD) to the right. Letters above the bars show statistical groups (ANOVA,  $p < 0.05$ ). *b.*

RAW264.7 cells were infected with Ad-GFP, Ad-FoxO1-WT, or Ad-FoxO1-CA at 100 M.O.I.; 48 hours post infection, cells were exposed to 100ng/ml LPS for 6 hours. mRNA expressions of various inflammatory genes were quantitated by ArrayPlate mRNA Assay (High Throughput Genomics, Inc. Tuscon, AZ). Notice that the LPS response of almost every genes were enhance by WT or CA-FoxO1.

### ***Supplemental Figure 2.***

*a-b.* Construction and validation of lentiviral short hairpin RNA against mouse FoxO1 (shFoxO1). Shown are schematic representation of short hairpin RNA (shRNA) lentiviral vector and the oligonucleotide sequences for constructing shFoxO1 lentivirus. SIN-LTR, self-inactivating long terminal repeat;  $\Psi$ , packaging signal; cPPT, central polypurine track; MCS, multiple cloning site; CMV, cytomegalovirus promoter; WRE, woodchuck hepatitis virus response element. *c.* Stable RAW264.7 macrophage cells were established by transduction of lentivirus encoding shFoxO1 and subsequent two rounds of sorting for

GFP-positive cells. Shown is endogenous FoxO1 mRNA in RAW264.7 macrophage cells stably expressing shFoxO1.

***Supplemental Figure 3.***

*a.* Bone marrow derived macrophages (BMDMs) derived from FoxO1 +/- or WT male mice were starved overnight in 0.1% BSA-containing medium, and treated with 100ng/ml LPS for 30 minutes. The cells were subsequently lysed for immunoblotting assays with the indicated antibodies. *b-c.* Relative amount of phosphorylated versus total protein levels for JNK (*b*) and P65 (*c*) were quantitated by NIH-Image J; and the results are shown as bar graphs (M±SD). Letters above the bars show statistical differences (ANOVA,  $p < 0.05$ ).

***Supplemental Figure 4.***

Hepatocytes were isolated in the conventional manner from HFD liver. Kupffer cells were then separated from the non-Kupffer cell-containing fraction by purifying cells on CD11b antibody magnetic beads. In each fraction, TNF $\alpha$  (*a*), IL-1 $\beta$  (*b*), IL-6 (*c*) and, Tlr4 (*d*) mRNA expressions were quantitated by realtime PCR. It is evident that essentially all of the TNF $\alpha$ , IL-1 $\beta$ , IL-6 and, Tlr4 mRNA is expressed in the Kupffer cell (CD11b+) fraction, with none in hepatocytes and very little in the CD11b- non-hepatocyte cell fraction. *e*, mRNA expression of Tlr4 in adipocytes and SVF fractions from adipose tissue of 60% high fat diet (HFD) fed mice. Expression level in adipocytes is set to 1. Data are presented as the average  $\pm$  SD. Letters above the bars show statistical groups (ANOVA,  $p < 0.05$ ).

***Supplemental Figure 5.***

FoxO1 does not affect PPAR $\gamma$ -dependent repression of LPS-induced iNOS expression in RAW264.7 cells. *a.* RAW264.7 cells were co-transfected with FoxO1-WT or control vector together with an iNOS-luc reporter and pcDNA-PPAR $\gamma$ , and then exposed to 100ng/ml LPS, 1 $\mu$ M Rosiglitazone or both for 6 hours prior to luciferase assay. *b.* FoxO1-DBD-M was applied as an alternate of FoxO1-WT in *a*, and its effect on PPAR $\gamma$  transrepression was assayed. Data are presented as the average  $\pm$  SD. Letters above the bars show statistical groups (ANOVA,  $p < 0.05$ ).

***Supplemental Figure 6.***

Schematic outline of BLRP-BirA tagging system and ChIP-Seq workflow. We applied an *in vivo* biotin tagging methodology in which FoxO1 is tagged at the N-terminus with BLRP, a substrate for the *E. coli* biotin ligase, BirA. Introduction of these tagged proteins into cell lines that express BirA resulted in their efficient biotinylation, enabling subsequent purification with streptavidin matrices. We generated two genetic expression vectors for this purpose. In one, BirA cDNA was placed under transcriptional control of the beta-actin promoter into a neomycin-resistant plasmid. This plasmid was then used to generate stable cell lines in mouse RAW264.7 macrophages. In the other, BLRP-tagged FoxO1 under the control of the beta-actin promoter was inserted into a puromycin-resistant plasmid. As seen in the figure, this latter vector was designed to place the BLRP peptide at the amino terminus of FoxO1 and to include a polyglycine spacer and TEV cleavage site. Stable cell lines expressing both BirA and BLRP-tagged FoxO1 were selected in the

presence of puromycin and neomycin, and clones that expressed the tagged protein at low or equivalent levels to the endogenous protein were selected.

Cells grown under the described experimental conditions of interest were subjected to formaldehyde cross-linking. Chromatin was prepared, sonicated into 200-300 bp fragments, and subjected to high affinity purification on a streptavidin affinity matrix. The matrix was subjected to TEV proteolysis to release the tagged protein and DNA adducts from the matrix, leaving behind any other biotinylated or non-specific bound proteins. Protein-DNA crosslinks were reversed by heating, and the resulting DNA was quantified and utilized to generate libraries for sequencing. Parallel sequencing was performed using the Illumina Genome Analyzer, and short reads (24bp) were mapped to the mouse reference genome. Identical reads were combined, and peaks were defined using standard software packages with robust statistical cutoffs. Secondary analysis included computational motif discovery to identify enriched sequence elements in genomic binding sites.

***Supplemental Figure 7.***

Functional confirmation of BLRP-FoxO1 fusion protein. *a-b*. Transactivational activity of BLRP-FoxO1 was assayed by testing the ability to induce an artificial FoxO1 target promoter (3×IRS-Luc) and a native target gene (G6Pase) promoter in HIRC-B cells. *c*. The ability of BLRP-FoxO1 to transrepress PPAR $\gamma$ -mediated gene expression was assayed in HIRC-B cells. In comparison to WT control, BLRP-FoxO1 exhibited normal transactivational and transrepressional activities.

***Supplemental Figure 8.***

Specific and effective biotinylation of BLRP-FoxO1 by BirA. BLRP-FoxO1 and/or BirA were ectopically expressed in HEK293 or HIRC-B cells as shown. Proper expression of BLRP-FoxO1 was confirmed by anti-FoxO1 blotting. Biotinylation of BLRP-FoxO1, but not wild type FoxO1, was confirmed by streptavidin-HRP recognition. Since AKT-mediated phosphorylation is a major mechanism that regulates FoxO1 biological function, we further confirmed that the phosphorylation status of FoxO1 did not alter biotinylation. In HEK293 cells cultured in full serum medium (constitutively active AKT), the specific and potent AKT inhibitor (AKTi) did not alter BLRP-FoxO1 biotinylation. On the other hand, in serum-starved HIRC-B (inactive AKT), insulin, which induces robust AKT activation, also did not alter BLRP-FoxO1 biotinylation.

***Supplemental Figure 9.***

*a.* Double stable RAW264.7 cell lines that expressed both BirA and BLRP-FoxO1 were selected in the presence of puromycin and neomycin. Expression levels of BLRP-FoxO1 were assayed by anti-FoxO1 blotting, and clones that expressed the tagged protein at low or equivalent levels to the endogenous protein were selected. Clones 24 and 25 were used in the present study. *b.* Overnight-starved double stable RAW264.7 were formaldehyde-crosslinked, and chromatin was prepared and fragmented to 200-300 bp fragments by sonication and subjected to high affinity purification on Streptavidin Magnetic Beads. The beads with bound chromatin-transcriptional complex were subjected to AcTEV Protease digestion to release the tagged protein and DNA adducts from the matrix, leaving behind any other biotinylated or non-specific bound proteins. *c.* Protein-DNA crosslinks were reversed by heating and the resulting DNA was purified. Q-PCR was conducted to confirm

a high enrichment of known FoxO1 target gene sequences (p27 gene) over background (AcTEV negative group). The non-related Gapdh promoter was included as a negative control.

***Supplemental Figure 10.***

Reconstitution of TLR4 signaling in HEK293 cells. An artificial Tlr4 signaling cascade was set up in HEK293 cells by co-expression of Tlr4, cDNA of which is driven by CMV promoter and therefore un-regulatable by FoxO1, together with CD14 and MD2.

Responses of NFκB-luc were assayed in response to either PBS or LPS stimulation.

***Supplemental Figure 11.***

WT(*a* and *c*) or Tlr4KO(*b* and *d*) primary peritoneal macrophages were infected with either Ad-GFP or Ad-FoxO1-CA at 100 M.O.I.. 48 hours later, cells were exposed to LPS (100ng/ml), TNFα (20ng/ml), TPA(100ng/ml) or PBS for 6 hours. IL6 mRNA (*a* and *b*) and MCP1 mRNA (*c* and *d*) was quantitated. mRNA levels in PBS groups were set to 1. Data are presented as the average ± SD. Asterisks indicate statistical significant difference (ANOVA,  $p < 0.05$ ).

***Supplemental Figure 12.***

*a.* RAW264.7 cells were starved overnight in 0.1% BSA DMEM(LG) medium and subsequently exposed to vehicle, 5μM AKTi, 300μM FFAs or FFAs+AKTi for 30 minutes; cells were then fixed, and the distribution of endogenous FoxO1 was detected by immunostaining with anti-FoxO1 antibody. DAPI DNA staining was performed to

indicate nuclei. *b-c*. We first surveyed 6 individual fatty acids (laurate, Myristate, Oleate, Palmitate,  $\alpha$ -linolenic acid and DHA) for their ability to activate AKT, and found that saturated fatty acids with a relatively shorter chain (laurate (C12:0) and Myristate (C14:0)) are more potent than those with a longer chain (Palmitate (C16:0) and Oleate (C18:0)); the unsaturated FA  $\alpha$ -linolenic acid (C18:3) also activated AKT. We then performed dose-dependent activation of AKT by laurate, myristate and  $\alpha$ -linolenic acid. For these experiments, RAW264.7 cells were starved overnight in 0.1% BSA DMEM (LG) medium and subsequently exposed to laurate, myristate or  $\alpha$ -linolenate at indicated concentration for 30', and then assayed for AKT activation by immunoblotting.

***Supplemental Figure 13.***

3% thioglycollate-elicited mouse peritoneal macrophages were infected with Ad-FoxO1-WT at 100 M.O.I.; 48 hours later, cells were subjected to overnight starvation in 0.1% BSA DMEM (LG) medium and subsequent exposure to 100ng/ml LPS or LPS+5 $\mu$ M AKTi for 30 minutes. Cells were then fixed for immunostaining with HA probe (153) antibody and DAPI DNA staining. Ad-FoxO1-CA infected peritoneal macrophages were also treated with LPS and stained with HA probe antibody.

***Supplemental Figure 14.***

RAW264.7 cells were starved overnight in 0.1% BSA DMEM (LG) medium and subsequently treated with 100ng/ml LPS for 30 minutes. Cells were then fixed and immunostained with anti-FoxO1 antibody. DAPI staining was performed to indicate nuclei.

***Supplemental Figure 15.***

*a*, Cell extracts of elicited peritoneal macrophages (IP-Mac, lane 1 and 2) or RAW264.7 cells (lane 4 and 5) were immunoblotted with specific antibodies against either Akt1 or Akt2. Recombinant Akt2 proteins were loaded (lane 3 and 6) to control antibody specificity.  $\beta$ -tubulin was also blotted for loading control. Note both peritoneal macrophages and RAW264.7 cells express exclusively Akt1. *b*, RAW264.7 cells were infected with either Ad-GFP or Ad-FoxO1-CA at 100 M.O.I.. 48 hours later, cells were exposed to 100ng/ml LPS for 15 or 30 minutes and then lysed for immunoblotting with antibodies against phospho-Akt (Ser 473), total Akt or the loading control Hsp90.

***Supplemental Figure 16.***

*a*, RAW264.7 macrophages were serum-starved in 0.1% BSA (endotoxin free)-containing medium for 16 hours. The cells were then treated with 100ng/ml of insulin for 15 and 30 minutes. Phosphorylation of IR and IRS1 (assayed by anti-phospho-Tyr, PY20 antibody) and Akt (Ser437) were blotted. Blots for total proteins were also shown. These data indicate the presence of a functional insulin signaling system in these cells. *b-e*, Serum-starved RAW264.7 cells were pretreated with 100ng/ml insulin or BSA control for 16 hours, and then 6 hours of 100ng/ml LPS-induced mRNA expression of TNF $\alpha$  (*b*), IL-6 (*c*), MCP1 (*d*), and iNOS (*e*) was quantitated by qPCR. Data are presented as the average  $\pm$  SD. Letters above the bars show statistical groups (ANOVA,  $p < 0.05$ ).

***Supplemental Figure 17.***



*a*, BMDMs were prepared from FoxO1<sup>+/-</sup> and WT mice. The cells were serum-starved and pretreated with or without 100ng/ml of insulin for 16 hours before stimulated with 100ng/ml LPS for 15 minutes. Phosphorylation of JNK and IKK were then assayed by specific antibodies. It's evident that pretreatment of BMDMs with insulin led to decreased IKK, and JNK activation by LPS in WT macrophages. Whereas, this effect was blurred in FoxO1<sup>+/-</sup> cells. *b-e*, BMDMs were similarly pre-treated with insulin and subjected to 6 hours of LPS stimulation at concentration of 100ng/ml. LPS-mediated mRNA expression of TNF $\alpha$  (*b*), IL6 (*c*), MCP1(*d*) and iNOS(*e*) was assayed by qPCR. Data are presented as the average  $\pm$  SD. Letters above the bars show statistical groups (ANOVA,  $p < 0.05$ ).

***Supplemental Figure 18.***

*a-b*, Epididymal fat pads from 60% HFD-fed (for 20 weeks from 6-weeks of age) and age-matched normal chow diet (NC)-fed mice were fixed and subjected to immunohistostaining for F4/80 (green) and FoxO1(red). Nuclear DNA was stained with 4',6-diamidino-2-phenylindole (DAPI, blue). Notice that F4/80 positive cells are dramatically increased in HFD-fed mice. Importantly, in ATMs of lean mice, endogenous FoxO1 is predominantly located in nuclei, whereas, in ATMs of HFD/obese mice, endogenous FoxO1 is predominantly cytoplasmic. *c*. mRNA expression of Tlr4 in adipocytes from HFD- or NC-fed mice. Expression levels in NC adipocytes are set to 100. Data are presented as the average  $\pm$  SD. Letters above the bars show statistical groups (ANOVA,  $p < 0.05$ ).

Fan W, et al. Supplemental Fig. 1

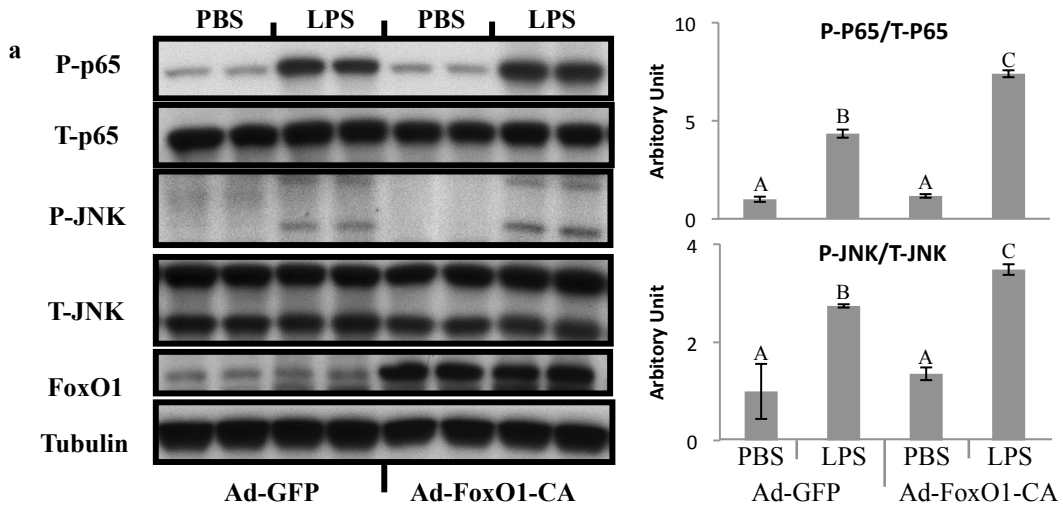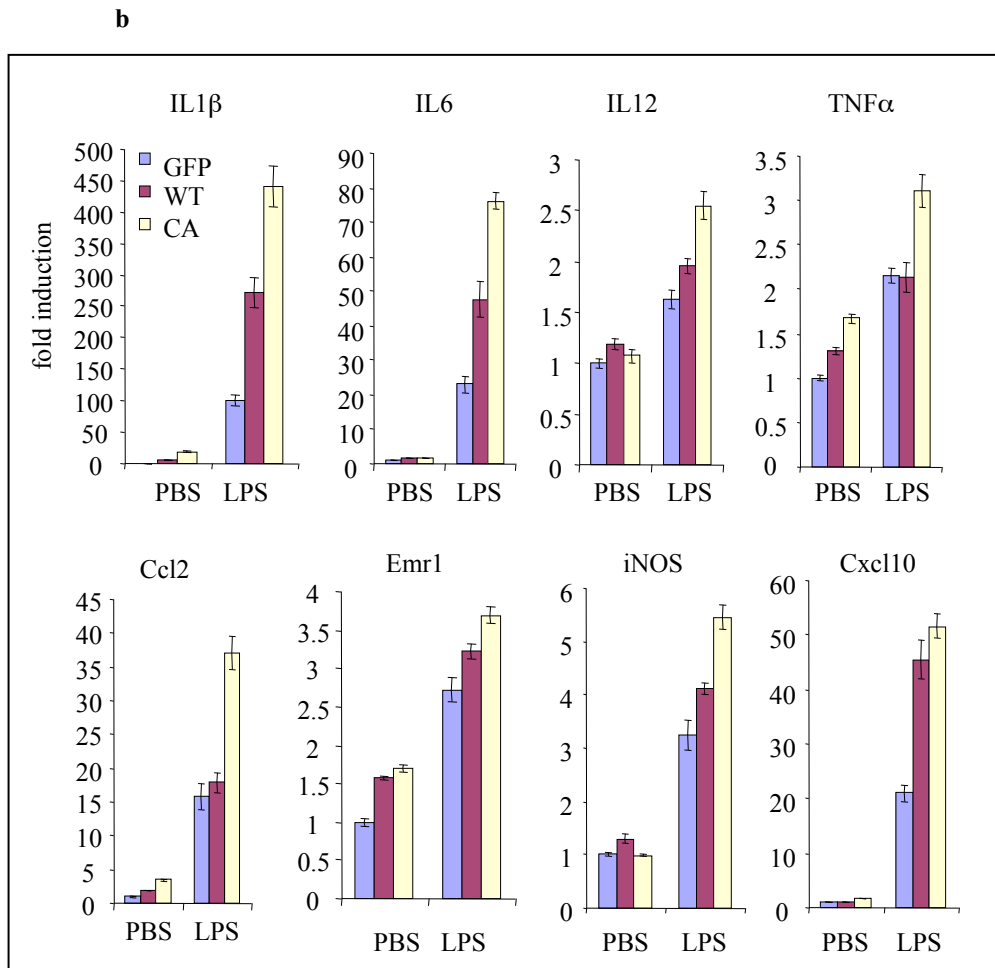

Fan W, et al. Supplemental Fig. 2

a

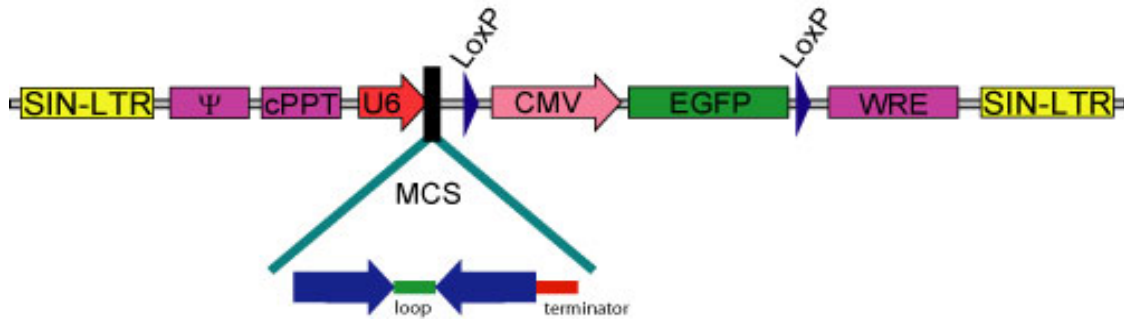

b

mFoxO1-sense      loop      mFoxO1-antisense      Terminator  
5' TgTacTgaTtttatgagTaacc **TTCAAGAGA** GGTTGCTCATAAAGTCGGTGC tttttt c 3'

c

FoxO1 mRNA in  
LV-shFoxO1 transduced RAW264.7 cells

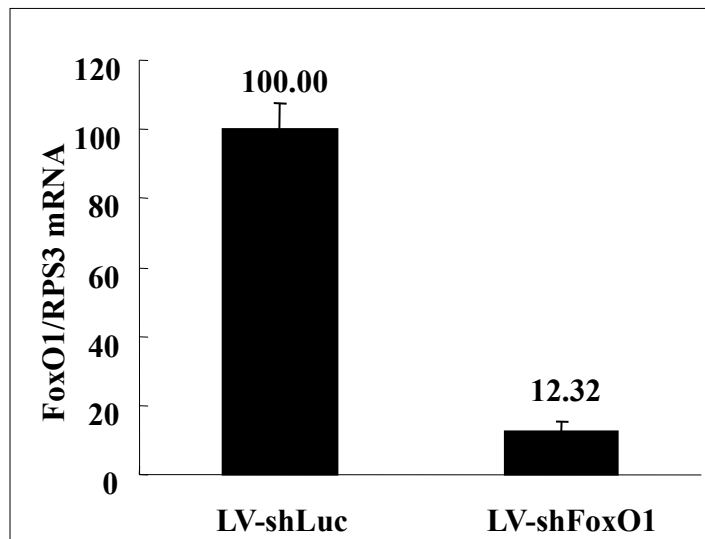

Fan W, et al. Supplemental Fig. 3

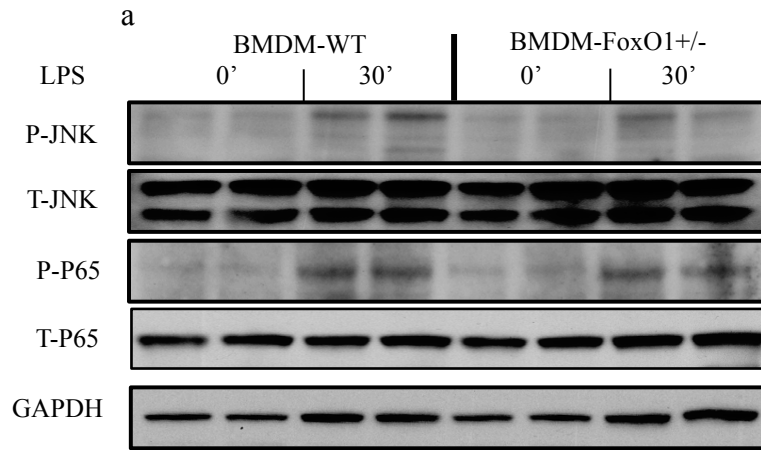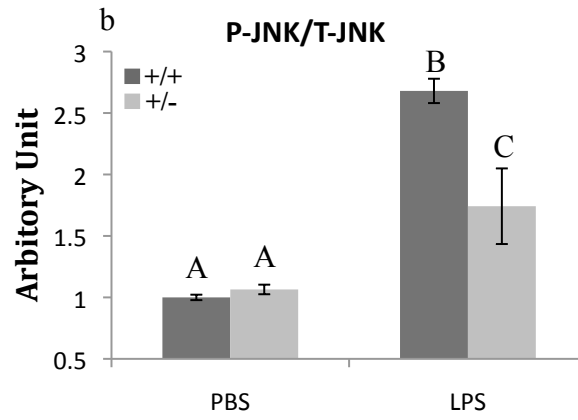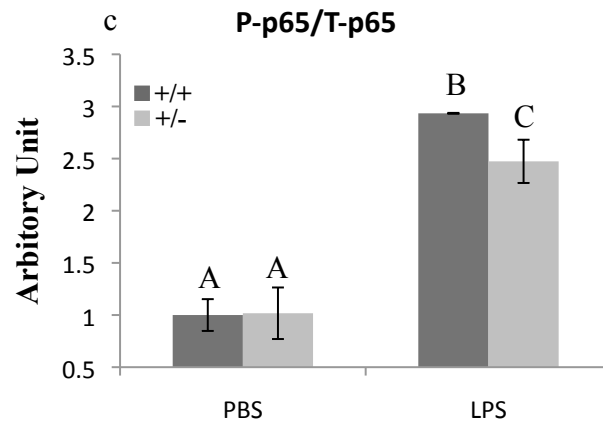

Fan W, et al. Supplemental Fig. 4

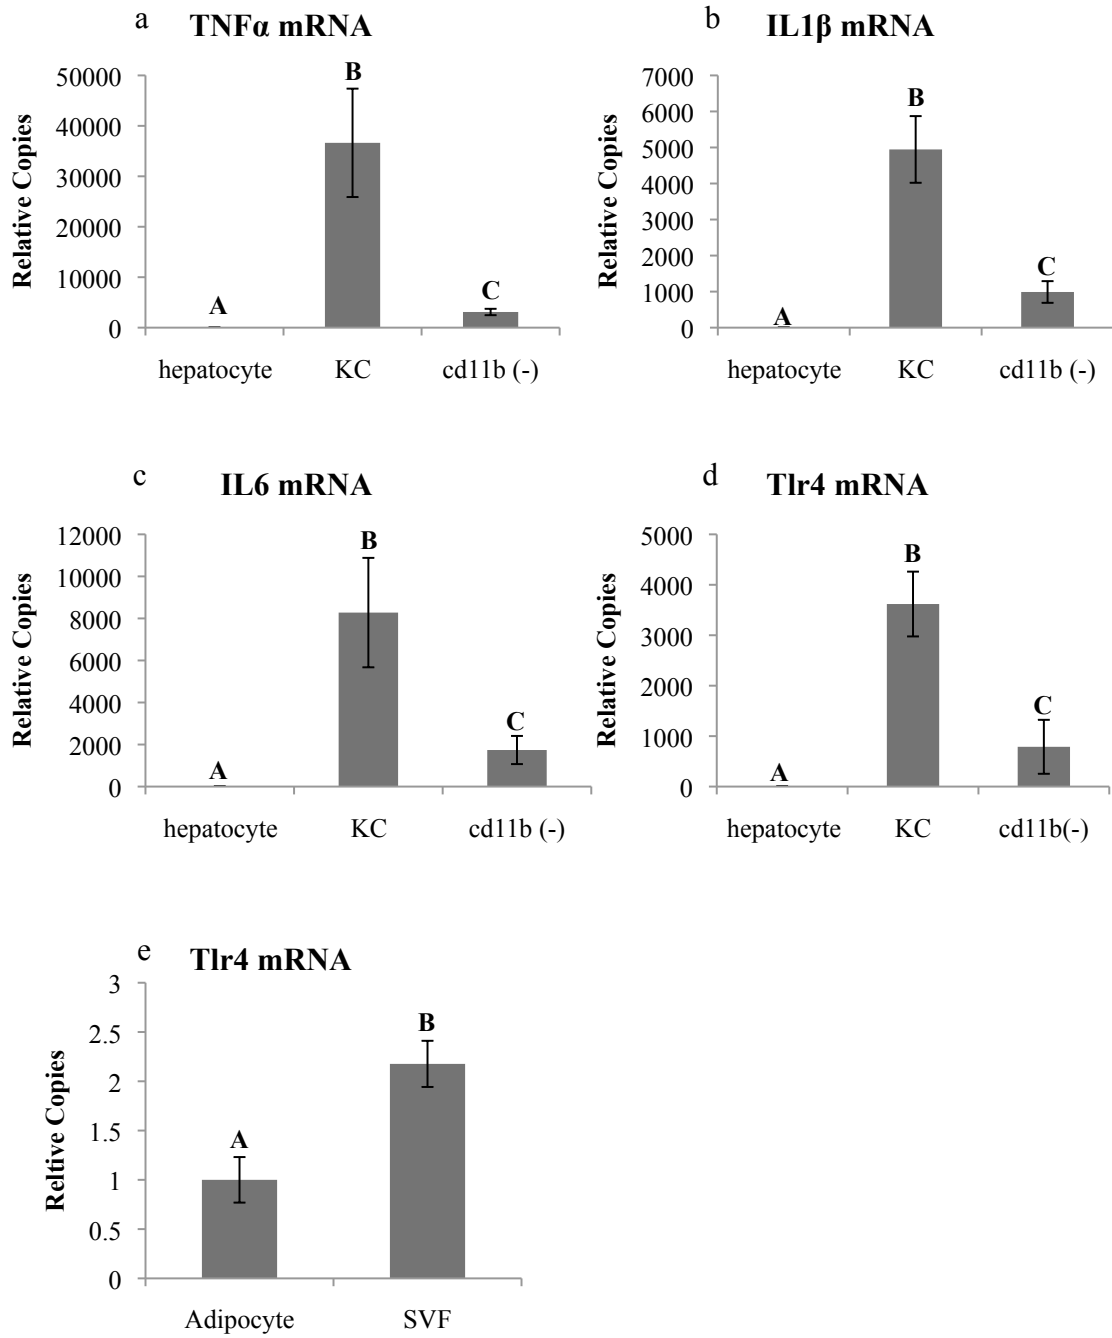

Fan W, et al. Supplemental Fig. 5

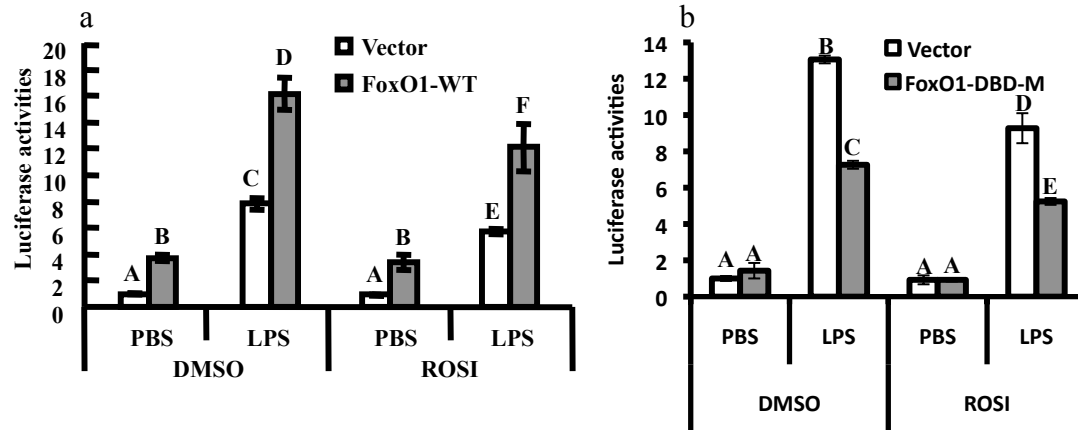

Fan W, et al. Supplemental Fig. 6

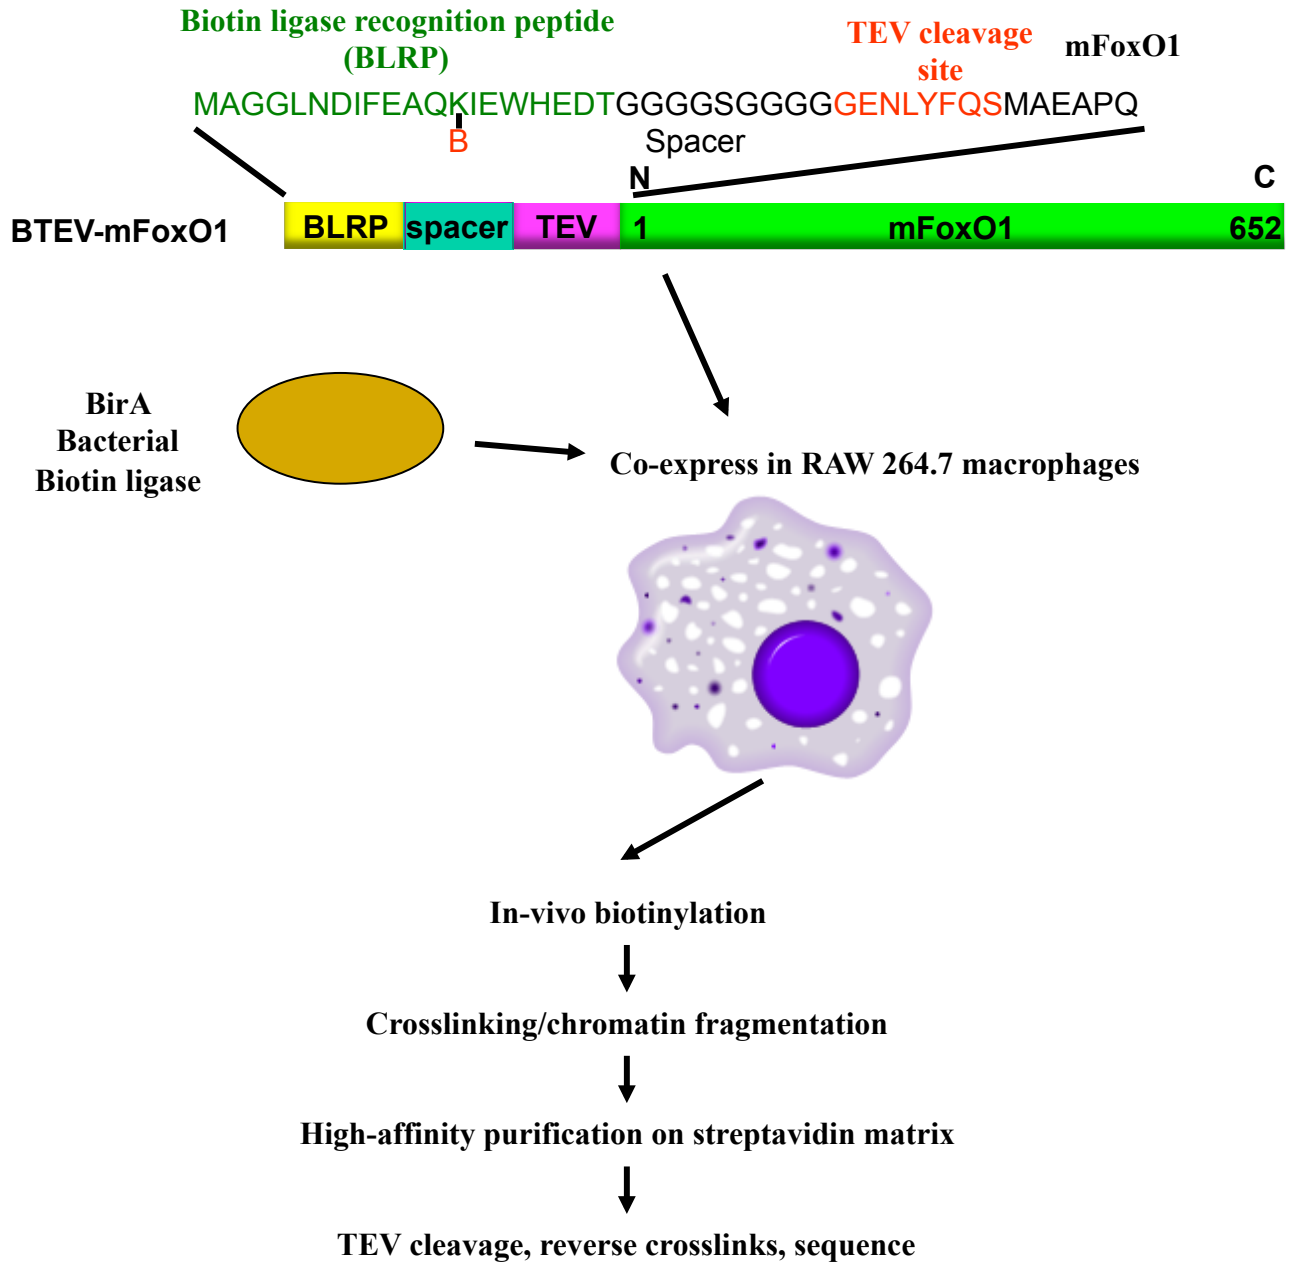

Fan W, et al. Supplemental Fig. 7

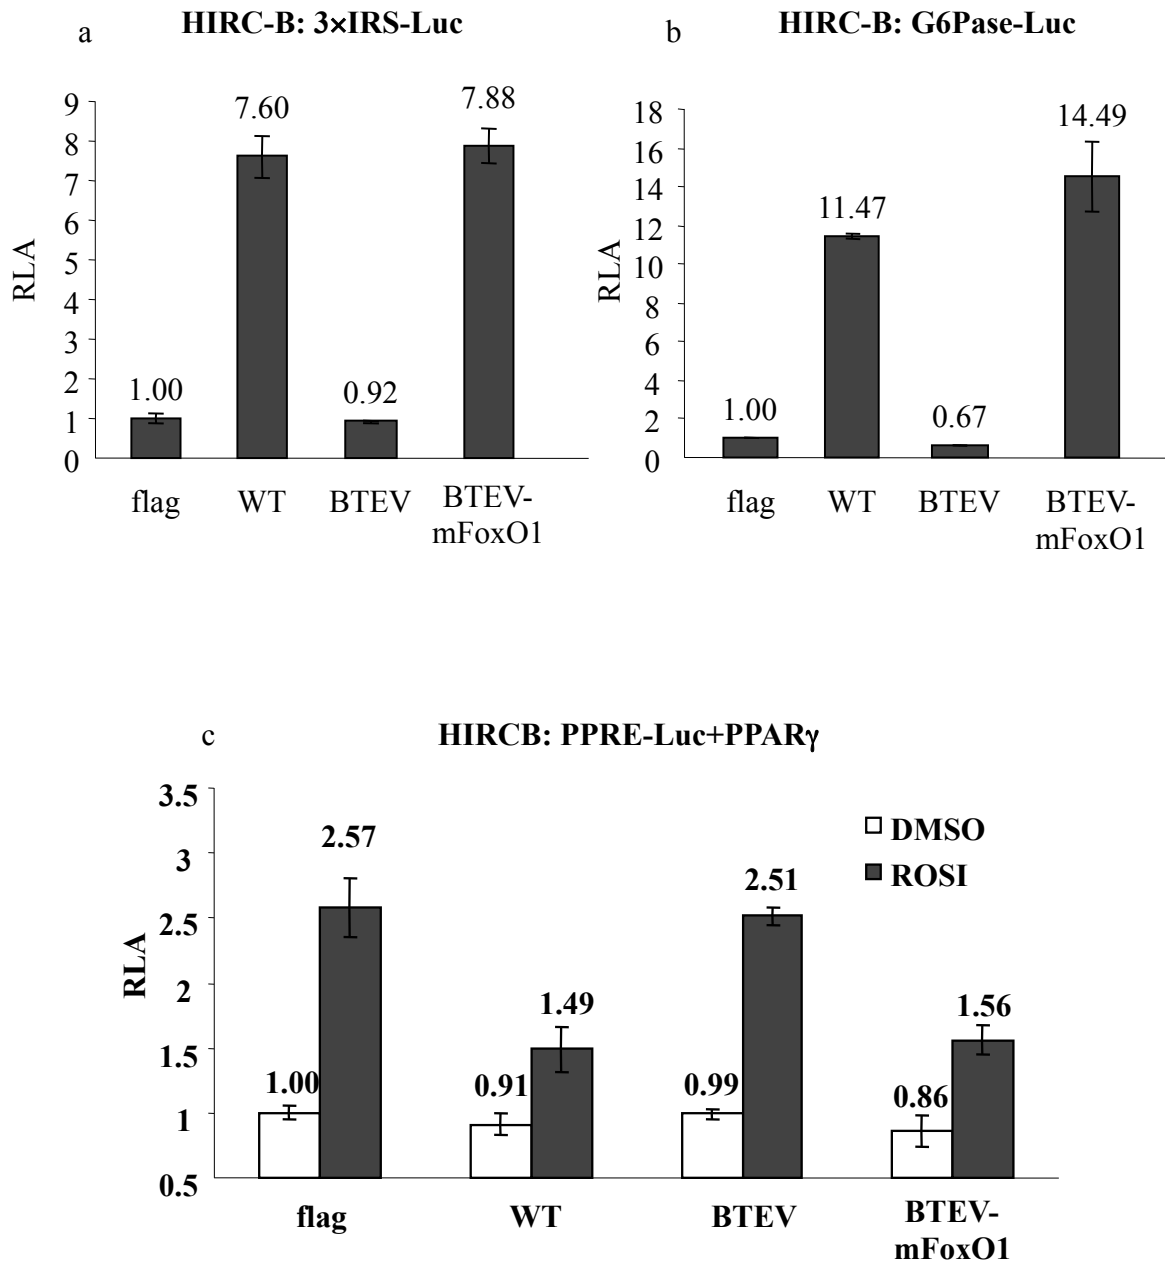



Fan W, et al. Supplemental Fig. 8

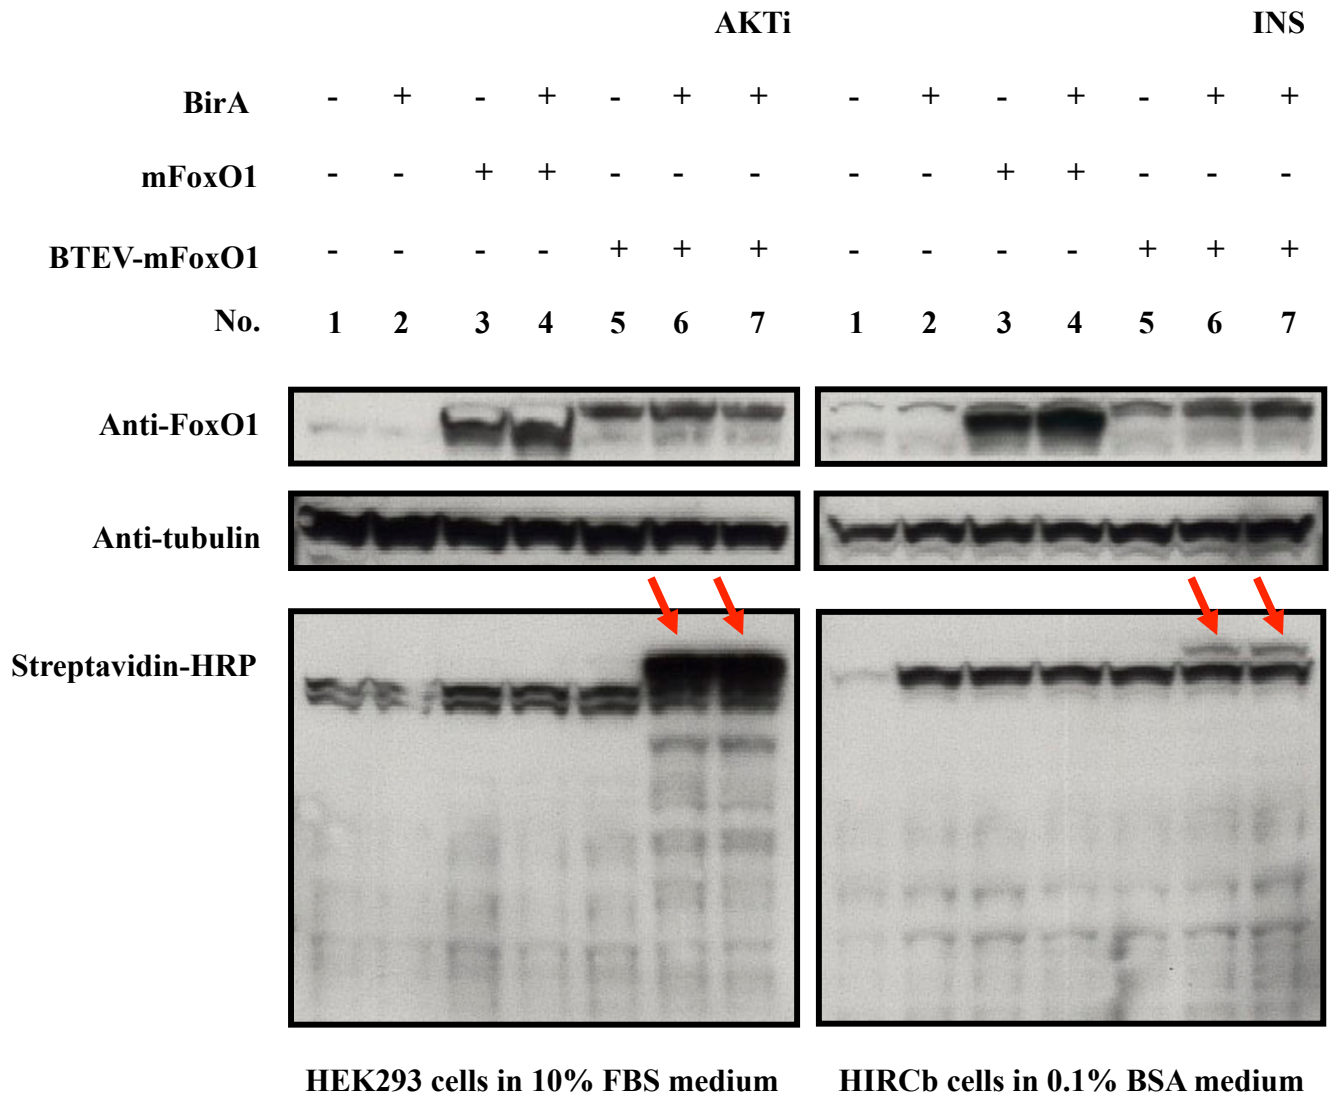



Fan W, et al. Supplemental Fig. 10

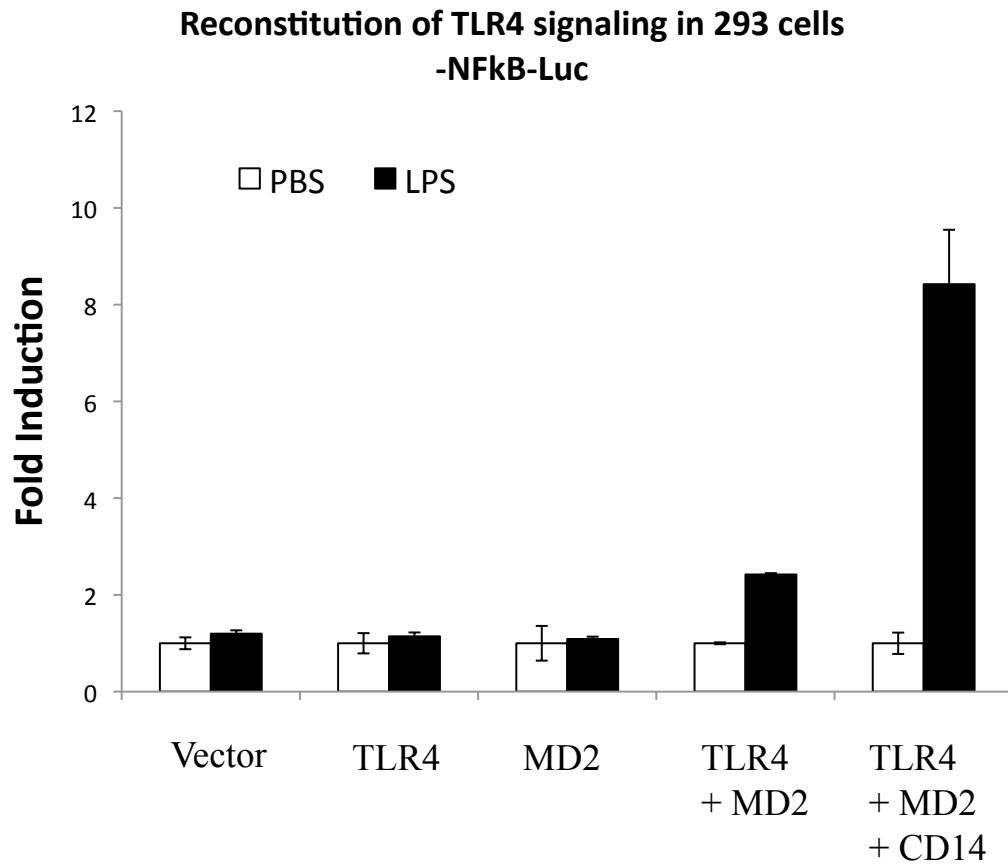

Fan W, et al. Supplemental Fig. 11

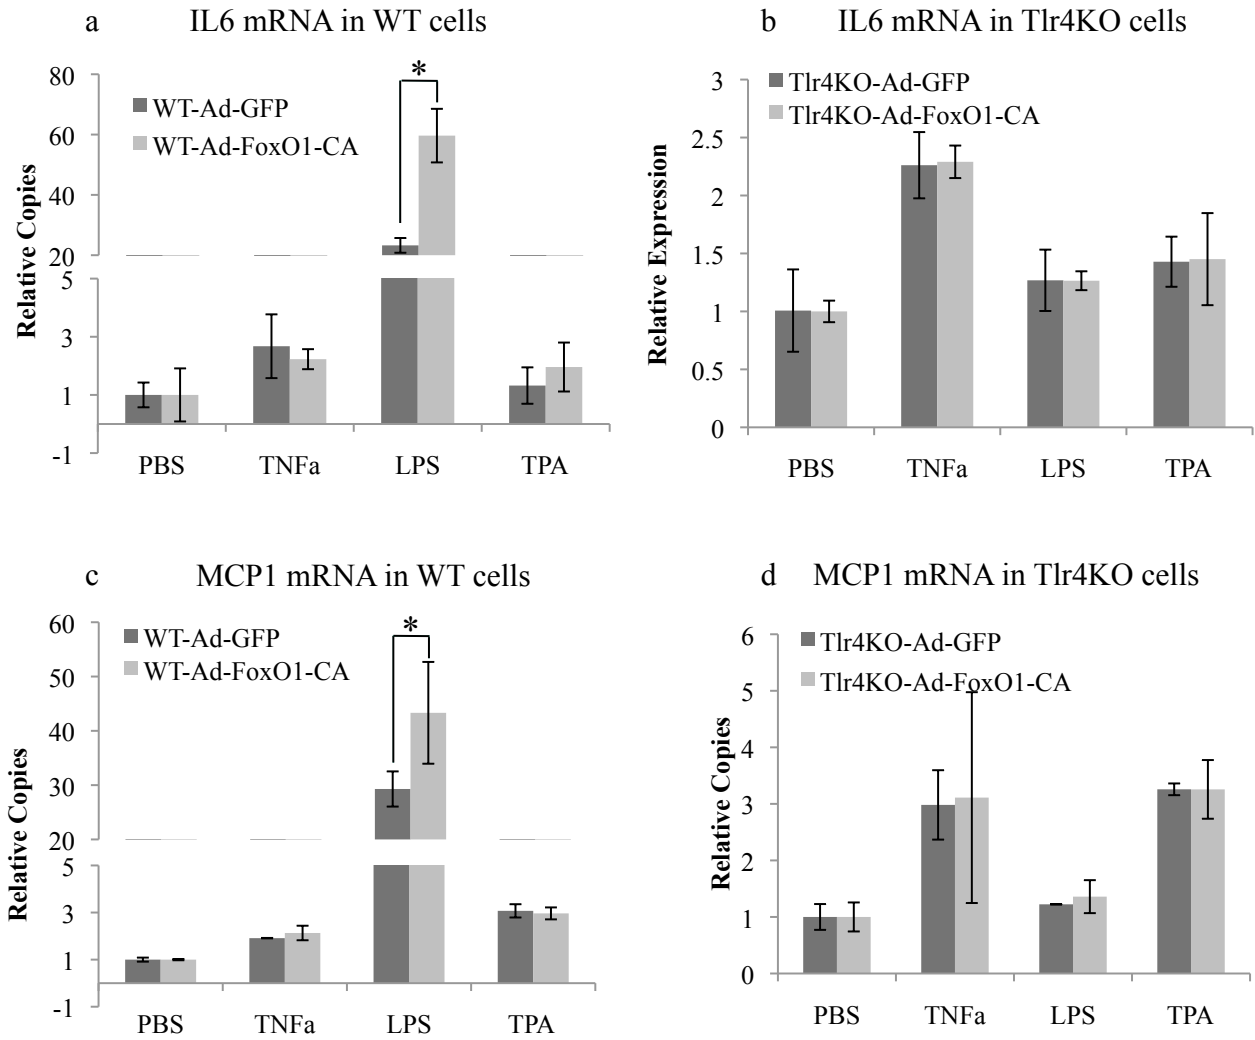

Fan W, et al. Supplemental Fig. 12

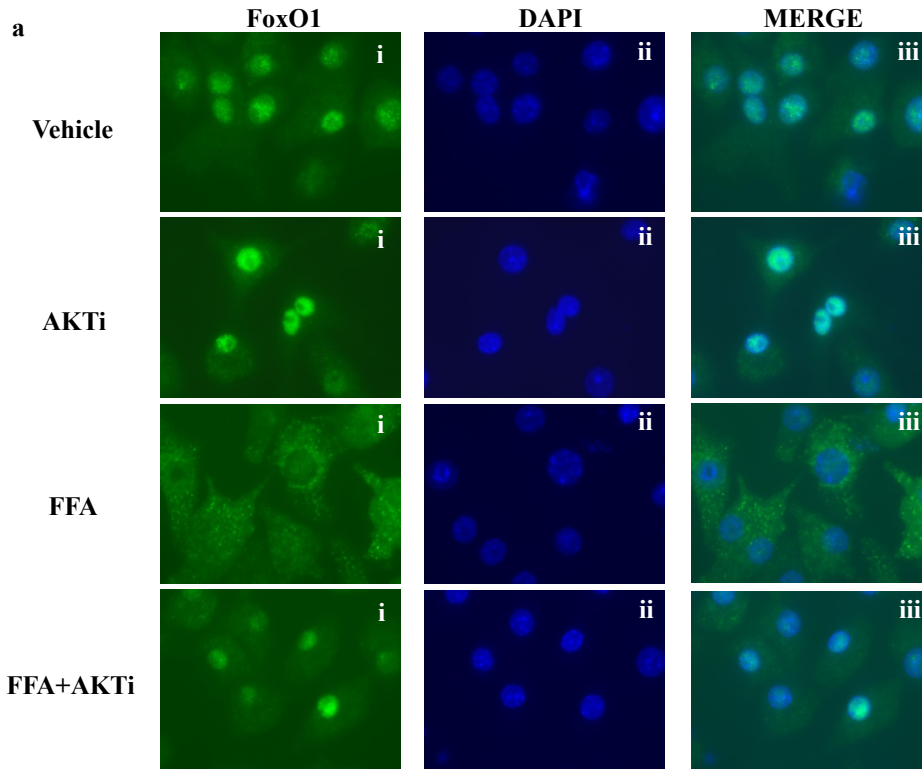

**b**

Individual FFA in RAW cells

(O/N starved RAW cells treated with 200 $\mu$ M FFA for 30' in 0.1 BSA medium)

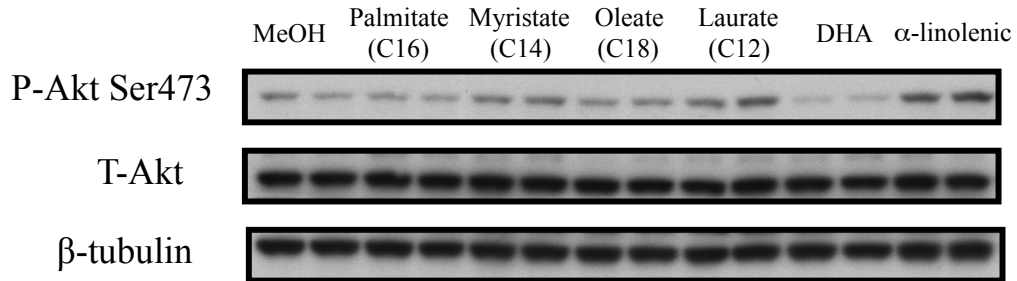

**c**

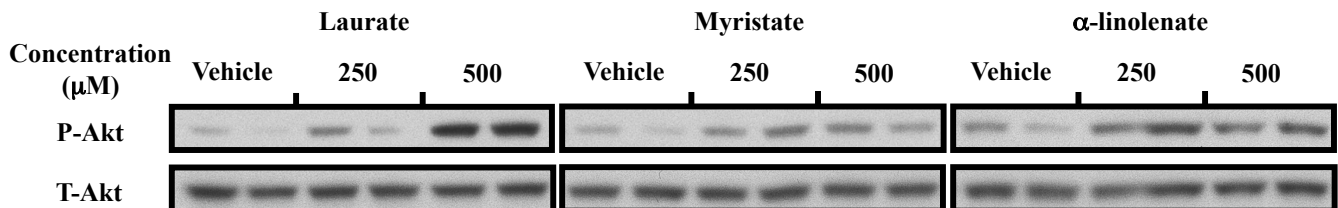

Fan W, et al. Supplemental Fig . 13

**FoxO1-WT in IP-Mac**

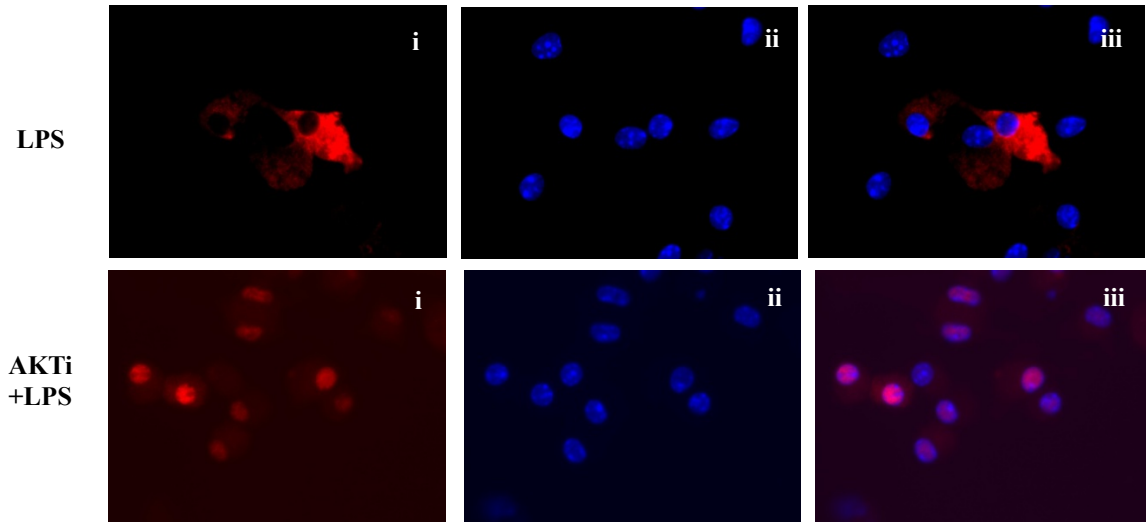

**FoxO1-CA in IP-Mac**

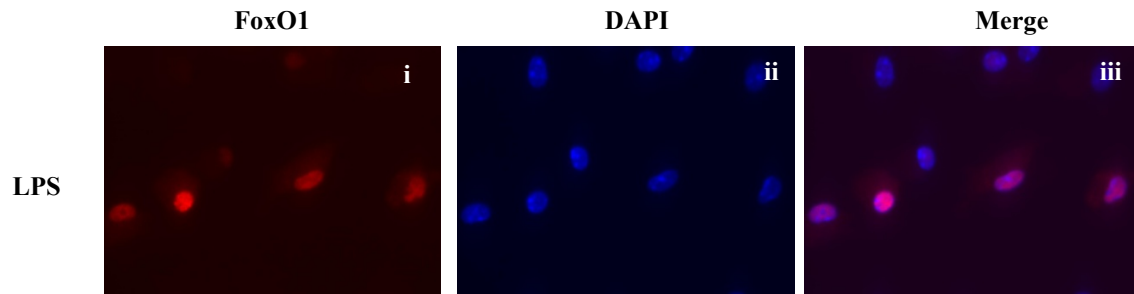

Fan W, et al. Supplemental Fig. 14

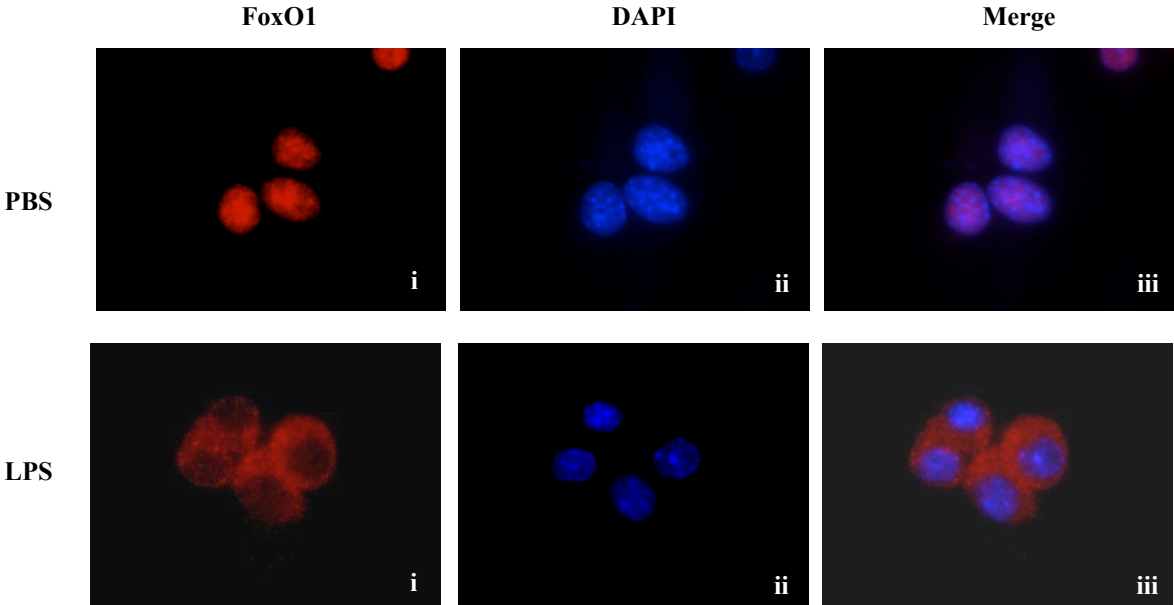

Fan W, et al. Supplemental Fig. 15

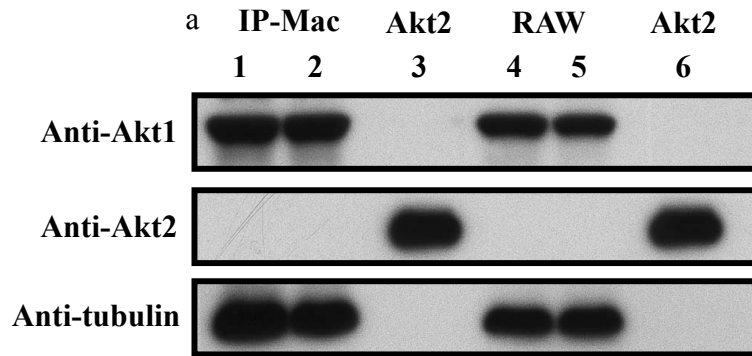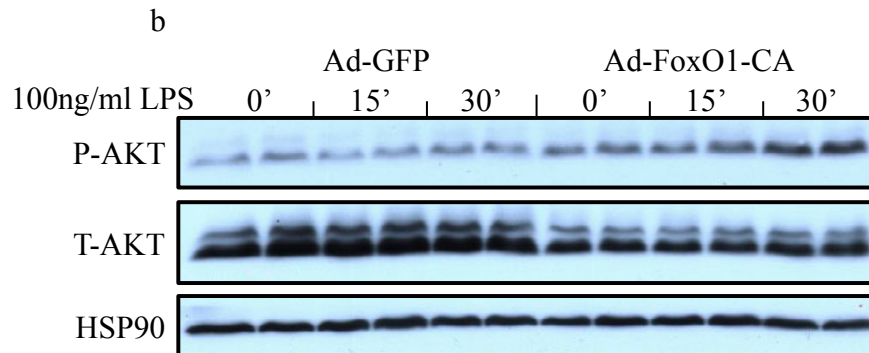



Fan W, et al. Supplemental Fig. 16

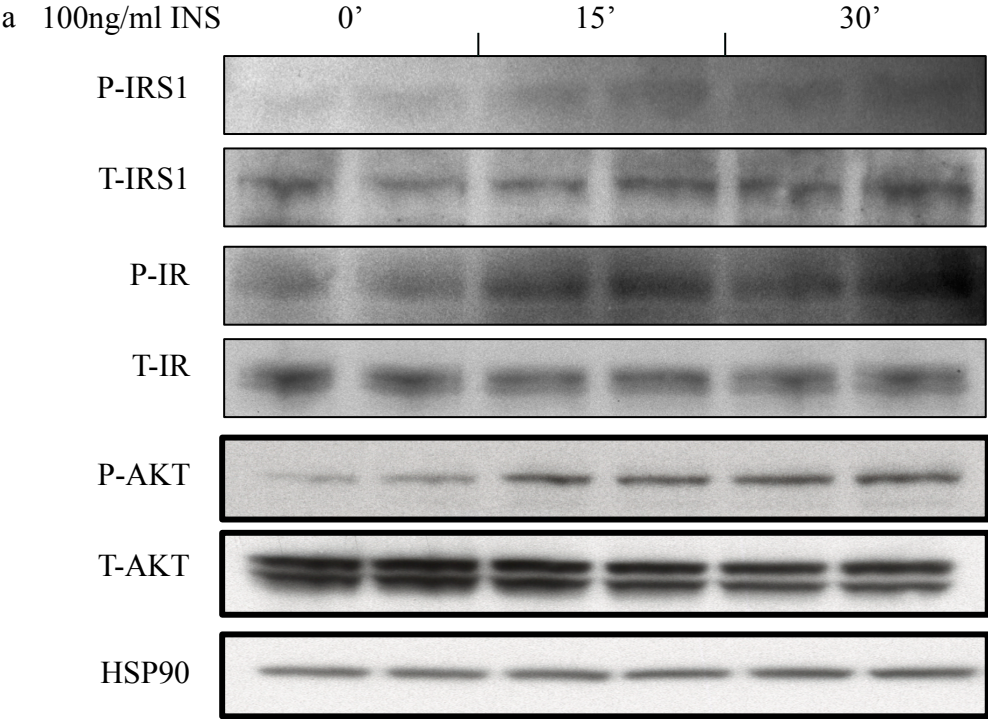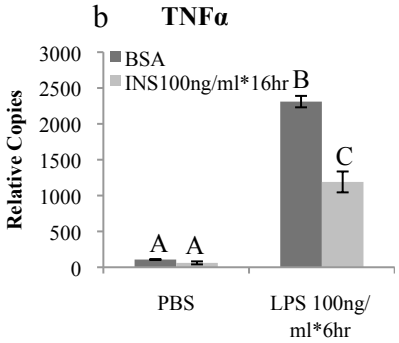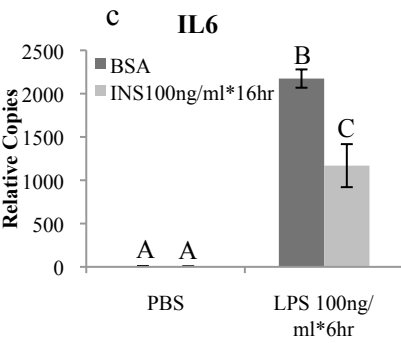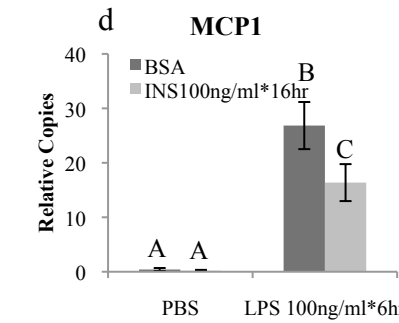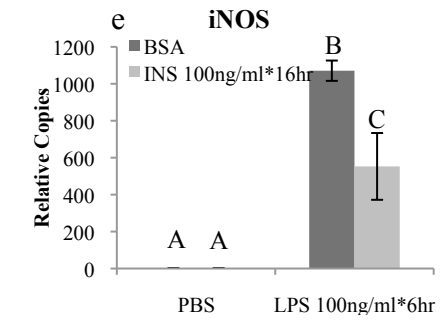

Fan W, et al. Supplemental Fig. 17

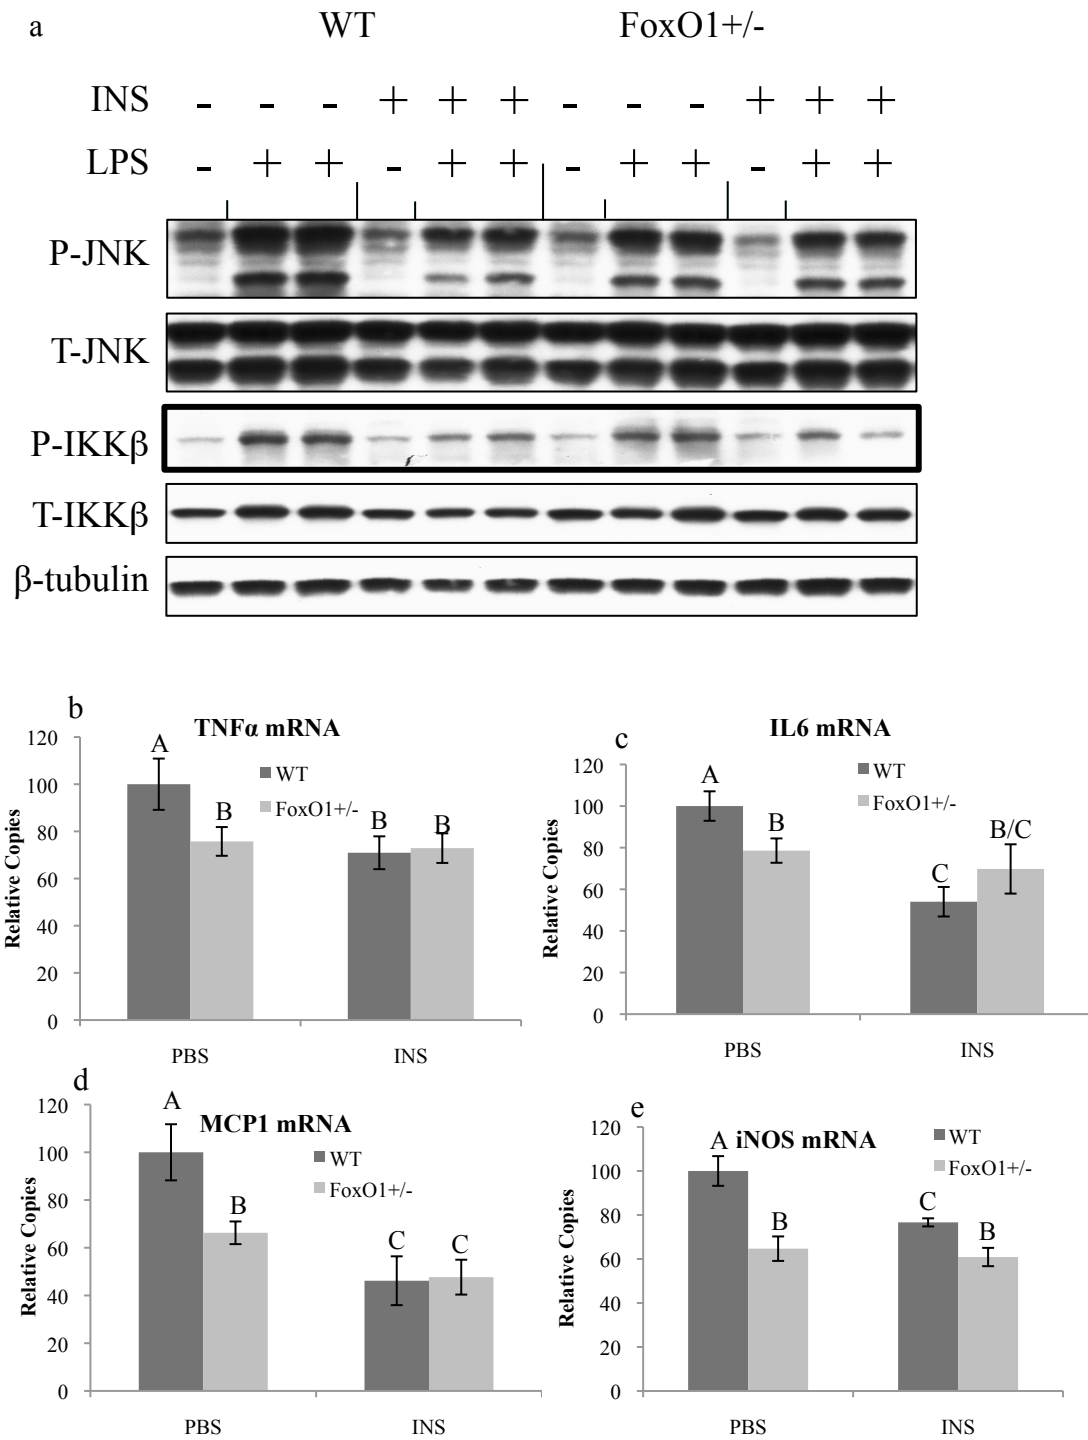

Fan W, et al. Supplemental Fig. 18

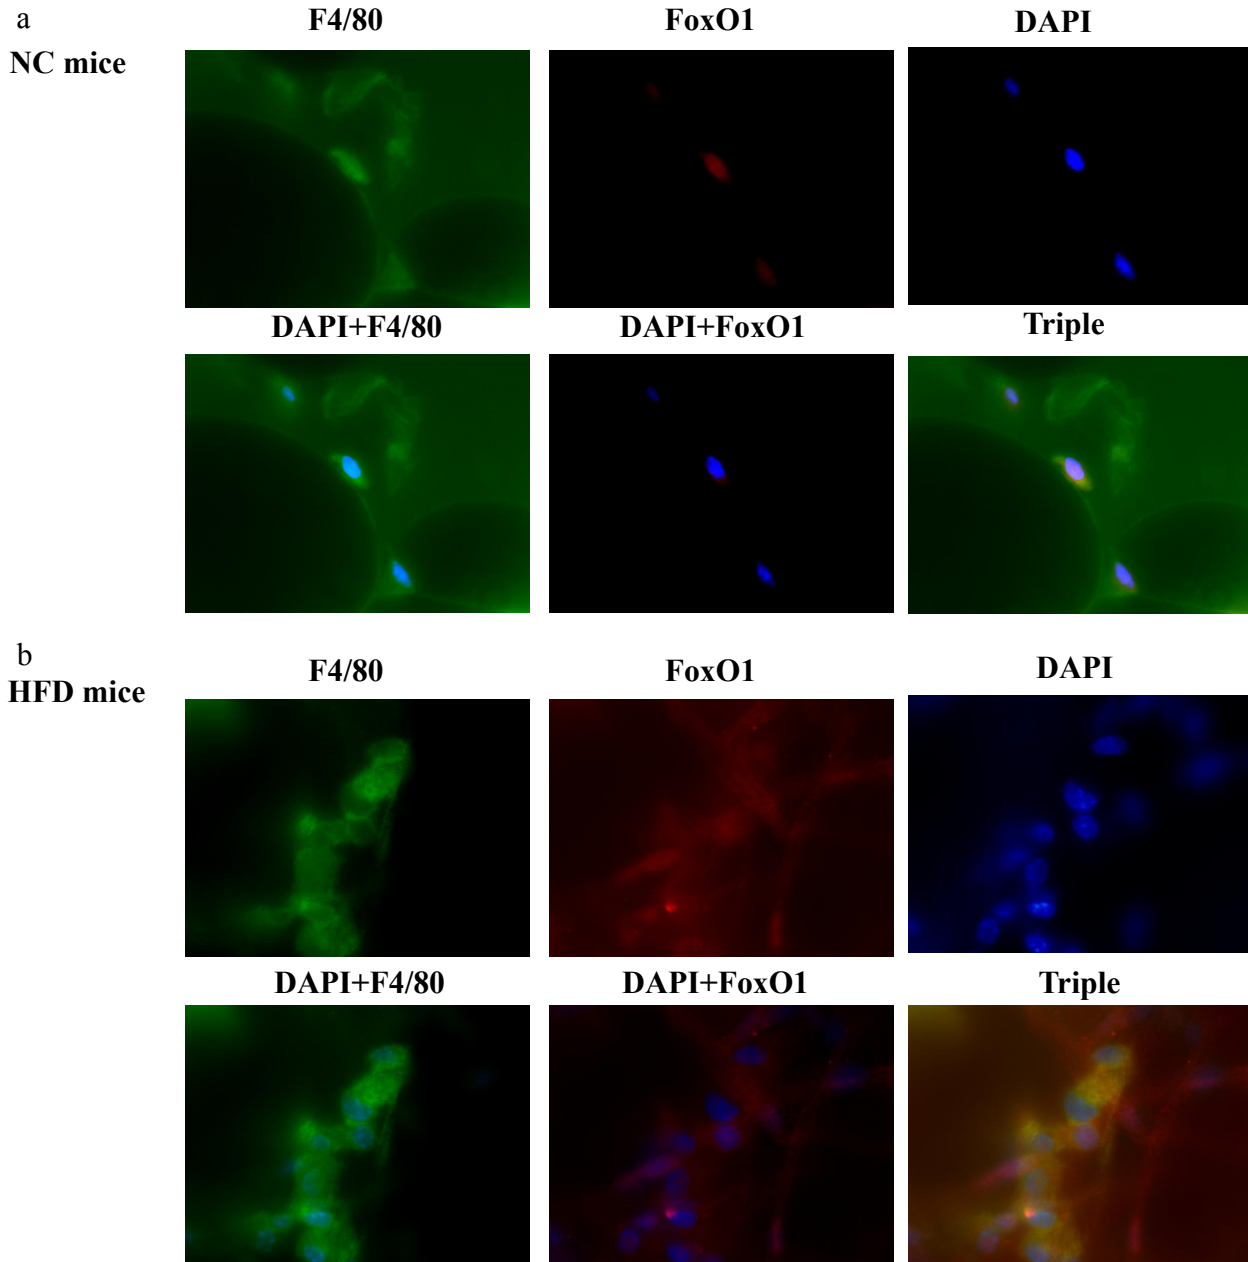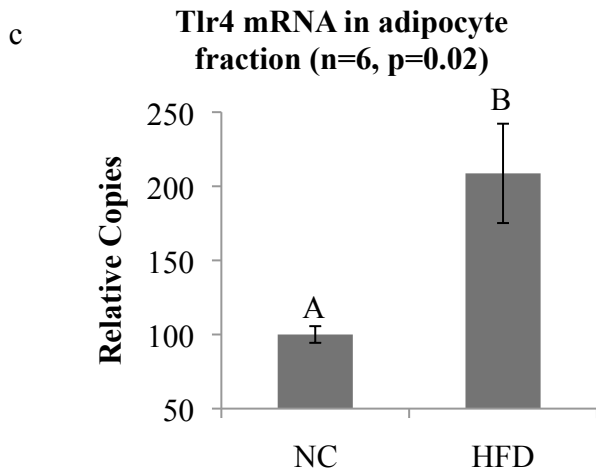

**Supplemental table 1- enriched known motif**

| Motif Name                             | Consensus        | P-value    | Log P-value | # of Genes | # of regula | # of Genes | #of regulated genes with Motif |
|----------------------------------------|------------------|------------|-------------|------------|-------------|------------|--------------------------------|
| PU.1/ThioMac-PU.1-ChIP-Seq/Homer       | AGAGGAAGTG       | 0.00E+00   | -3.47E+03   | 50000      | 13334       | 11338      | 6626                           |
| AP-1/ThioMac-PU.1-ChIP-Seq/Homer       | ATGACTCATC       | 0.00E+00   | -3.36E+03   | 50000      | 13334       | 6788       | 4772                           |
| Jun-AP1/K562-clun-ChIP-Seq/Homer       | NATGACTCATNN     | 0.00E+00   | -3.25E+03   | 50000      | 13334       | 5796       | 4276                           |
| Fos/bZIP                               | GTGAGTCA         | 0.00E+00   | -3.22E+03   | 50000      | 13334       | 7096       | 4844                           |
| ETS/Promoter/Homer                     | AACCGGAAGT       | 0.00E+00   | -2.58E+03   | 50000      | 13334       | 15511      | 7502                           |
| GABPA/Jurkat-GABPa-ChIP-Seq/Homer      | NACCGGAAGT       | 0.00E+00   | -2.56E+03   | 50000      | 13334       | 15028      | 7334                           |
| SP1/ETS                                | NGGAAG           | 0.00E+00   | -2.18E+03   | 50000      | 13334       | 27449      | 10477                          |
| SP1B/ETS                               | AGAGGAA          | 0.00E+00   | -2.06E+03   | 50000      | 13334       | 14012      | 6667                           |
| ETS class/ETS                          | ACCGGAAG         | 0.00E+00   | -1.95E+03   | 50000      | 13334       | 18490      | 7941                           |
| Ets1-like/CD4+-PolIII-ChIP-Seq/Homer   | AACAGGAAGT       | 0.00E+00   | -1.93E+03   | 50000      | 13334       | 10577      | 5438                           |
| Eip74EF/ETS                            | CCGGAAG          | 0.00E+00   | -1.86E+03   | 50000      | 13334       | 17581      | 7605                           |
| ELF5/ETS                               | TACTTCCTT        | 0.00E+00   | -1.81E+03   | 50000      | 13334       | 19869      | 8228                           |
| NF-E2/K562-NFE2-ChIP-Seq/Homer         | GATGACTCAGCA     | 0.00E+00   | -1.65E+03   | 50000      | 13334       | 10225      | 5115                           |
| ETS1/ETS                               | CTTCCG           | 0.00E+00   | -1.51E+03   | 50000      | 13334       | 24170      | 9132                           |
| GABPA/ETS                              | ACCGGAAGAG       | 0.00E+00   | -1.35E+03   | 50000      | 13334       | 13979      | 6092                           |
| PU.1-IRF/Bcell-PU.1-ChIP-Seq/Homer     | CGGAAGTGAAC      | 0.00E+00   | -9.20E+02   | 50000      | 13334       | 15542      | 6141                           |
| FOXD1/FORKHEAD                         | GTAACAT          | 0.00E+00   | -7.99E+02   | 50000      | 13334       | 2564       | 1620                           |
| TCF11-MafG/bZIP                        | NATGAC           | 1.877e-322 | -7.41E+02   | 50000      | 13334       | 15012      | 5777                           |
| Foxa2/Liver-Foxa2-ChIP-Seq/Homer       | CNTGTTTACATA     | 2.55E-304  | -6.99E+02   | 50000      | 13334       | 6275       | 2955                           |
| Pax2/PAIRED                            | NGTCACGN         | 2.55E-287  | -6.60E+02   | 50000      | 13334       | 11304      | 4556                           |
| CREB1/bZIP                             | CNTGGTGACGNTN    | 3.14E-263  | -6.04E+02   | 50000      | 13334       | 26330      | 8720                           |
| ELK4/ETS                               | ACCGGAAGT        | 2.81E-238  | -5.47E+02   | 50000      | 13334       | 11078      | 4345                           |
| MIZF/ZNF-FINGER, C2H2                  | NAACGTCGCG       | 3.28E-235  | -5.40E+02   | 50000      | 13334       | 12376      | 4731                           |
| ELK1/ETS                               | NNNCCGGAAG       | 1.12E-234  | -5.39E+02   | 50000      | 13334       | 19402      | 6762                           |
| DCE_S_I/Unknown                        | GCTTCN           | 1.12E-221  | -5.09E+02   | 50000      | 13334       | 7609       | 3201                           |
| Forkhead class/Forkhead                | TGTTTTATT        | 1.74E-214  | -4.92E+02   | 50000      | 13334       | 15069      | 5460                           |
| MafB/bZIP, MAF                         | GCTGACGN         | 5.19E-208  | -4.77E+02   | 50000      | 13334       | 26732      | 8636                           |
| STAT1/Stat                             | GGAAAACGAAAACG   | 1.20E-199  | -4.58E+02   | 50000      | 13334       | 15869      | 5639                           |
| CRE/Promoter/Homer                     | CGGTGACGTCAC     | 7.06E-197  | -4.52E+02   | 50000      | 13334       | 26647      | 8573                           |
| Myf/bHLH                               | CAGCAGCTGCTG     | 1.18E-187  | -4.30E+02   | 50000      | 13334       | 26916      | 8608                           |
| MAX/bHLH-ZIP                           | NACCACGTGN       | 3.63E-183  | -4.20E+02   | 50000      | 13334       | 6821       | 2836                           |
| Mycn/bHLH-ZIP                          | CACGTG           | 7.13E-180  | -4.13E+02   | 50000      | 13334       | 10288      | 3917                           |
| RUNX(AML)/CD4+-PolII-ChIP-Seq/Homer    | GCTGTGGTTT       | 1.50E-173  | -3.98E+02   | 50000      | 13334       | 25790      | 8259                           |
| USF1/bHLH-ZIP                          | CACGTGG          | 3.11E-173  | -3.97E+02   | 50000      | 13334       | 5793       | 2470                           |
| FOXP2/FORKHEAD                         | NNAACGTAACAAN    | 4.43E-169  | -3.88E+02   | 50000      | 13334       | 4853       | 2143                           |
| E-box/Promoter/Homer                   | CCGGTCACGTGA     | 8.77E-160  | -3.66E+02   | 50000      | 13334       | 12994      | 4655                           |
| BRCA1/-                                | NCAACAC          | 1.02E-153  | -3.52E+02   | 50000      | 13334       | 14452      | 5056                           |
| CEBP/CEBPb-ChIP-Seq/Homer              | ATTGCGCAAC       | 1.15E-153  | -3.52E+02   | 50000      | 13334       | 3486       | 1630                           |
| Max/K562-Max-ChIP-Seq/Homer            | ACCACGTGGTNN     | 4.34E-153  | -3.51E+02   | 50000      | 13334       | 9180       | 3485                           |
| DCE_S_II/Unknown                       | NCTGTG           | 3.10E-150  | -3.44E+02   | 50000      | 13334       | 26698      | 8400                           |
| c-Jun-CRE/K562-clun-ChIP-Seq/Homer     | ATGACGTCATCN     | 1.92E-148  | -3.40E+02   | 50000      | 13334       | 4725       | 2044                           |
| n-Myc/mES-nMyc-ChIP-Seq/Homer          | NNCCACGTGG       | 5.18E-145  | -3.32E+02   | 50000      | 13334       | 9947       | 3690                           |
| Reverb(DR2)/BLRP(RAW)-Reverba-ChIP-Seq | GATAGTCACGGTCA   | 1.83E-129  | -2.96E+02   | 50000      | 13334       | 26578      | 8276                           |
| MZF1_1_4/ZNF-FINGER, C2H2              | TGGGGA           | 6.24E-113  | -2.58E+02   | 50000      | 13334       | 26507      | 8178                           |
| CEBP-AP1/ThioMac-CEBPb-ChIP-Seq/Homer  | NATGTTGCAA       | 1.73E-111  | -2.55E+02   | 50000      | 13334       | 5274       | 2113                           |
| Gc-box/Unknown                         | NGGGGGGGGGGCTN   | 1.82E-110  | -2.53E+02   | 50000      | 13334       | 26478      | 8158                           |
| Cebpa/bZIP                             | TTNCGCAATNTN     | 6.01E-108  | -2.47E+02   | 50000      | 13334       | 4556       | 1868                           |
| Bapx1/HOMEO                            | NTAAGTGGN        | 6.17E-104  | -2.38E+02   | 50000      | 13334       | 26449      | 8117                           |
| CTCF/CD4+-CTCF-ChIP-Seq/Homer          | ANAGTGCCACCTGGTC | 8.95E-104  | -2.37E+02   | 50000      | 13334       | 26167      | 8042                           |
| HLF/bZIP                               | GGTTACGCAATN     | 1.20E-103  | -2.37E+02   | 50000      | 13334       | 4476       | 1828                           |
| ISRE/ThioMac-LPS-exp/HOMER             | AGTTTCAGTTTC     | 1.93E-101  | -2.32E+02   | 50000      | 13334       | 17349      | 5641                           |
| c-Myc/cMyc-ChIP-Seq/Homer              | NNCCACGTGG       | 1.63E-99   | -2.28E+02   | 50000      | 13334       | 8499       | 3072                           |
| Mycb/TRP-CLUSTER                       | GGCNGTTG         | 4.57E-98   | -2.24E+02   | 50000      | 13334       | 25671      | 7881                           |
| ovo/ZNF-FINGER, C2H2                   | AGTAACNGT        | 4.96E-96   | -2.19E+02   | 50000      | 13334       | 21775      | 6828                           |
| NHLH1/bHLH                             | NGCAGCTGCGN      | 1.29E-95   | -2.19E+02   | 50000      | 13334       | 26214      | 8011                           |
| FOXA1/MCF7-FOXA1-ChIP-Seq/Homer        | AAAGTAAACA       | 1.72E-94   | -2.16E+02   | 50000      | 13334       | 5151       | 2015                           |
| MYC-MAX/bHLH-ZIP                       | GACCACTGGT       | 1.84E-94   | -2.16E+02   | 50000      | 13334       | 20537      | 6483                           |
| bZIP911/bZIP                           | GATGACGTGGCC     | 3.32E-94   | -2.15E+02   | 50000      | 13334       | 24007      | 7418                           |
| AARE/mES-cMyc-ChIP-Seq/Homer           | GATTGCATCA       | 9.76E-92   | -2.10E+02   | 50000      | 13334       | 16923      | 5471                           |
| bZIP cEBP-like subclass/bZIP           | ATTGCATAA        | 6.94E-91   | -2.08E+02   | 50000      | 13334       | 5533       | 2123                           |
| GAMYB/TRP-CLUSTER                      | GACAACCGCC       | 2.12E-90   | -2.07E+02   | 50000      | 13334       | 20293      | 6394                           |
| bHLH(zip) class/bHLH(zip)              | ANCACGTG         | 5.19E-87   | -1.99E+02   | 50000      | 13334       | 24654      | 7550                           |
| TRP(MYB) class/TRP                     | TNTCGGTT         | 8.59E-86   | -1.96E+02   | 50000      | 13334       | 25517      | 7772                           |
| Srebp1a/HepG2-Srebp1a-ChIP-Seq/Homer   | ATCACCCAT        | 6.92E-85   | -1.94E+02   | 50000      | 13334       | 26222      | 7953                           |
| GFY/Promoter/Homer                     | ACTACAATTC       | 1.73E-84   | -1.93E+02   | 50000      | 13334       | 26227      | 7952                           |
| bZIP910/bZIP                           | ATGACGT          | 5.38E-82   | -1.87E+02   | 50000      | 13334       | 25960      | 7867                           |
| Arnt-Ahr/bHLH                          | TGCGTG           | 2.20E-80   | -1.83E+02   | 50000      | 13334       | 26273      | 7940                           |
| RUNX1/RUNT                             | TATTGTGGTTA      | 2.28E-80   | -1.83E+02   | 50000      | 13334       | 4294       | 1690                           |
| RELA/REL                               | GGGAATTC         | 5.86E-80   | -1.82E+02   | 50000      | 13334       | 5059       | 1932                           |
| ARE/LNCAP-AR-ChIP-Seq/Homer            | NAGAACAGNNTGTC   | 2.70E-78   | -1.79E+02   | 50000      | 13334       | 26104      | 7883                           |
| Foxq1/FORKHEAD                         | NATTTGTTATT      | 7.84E-74   | -1.68E+02   | 50000      | 13334       | 7864       | 2766                           |
| id1/ZNF-FINGER, C2H2                   | TTTTCTTTTCG      | 4.25E-71   | -1.62E+02   | 50000      | 13334       | 26174      | 7857                           |
| INR/Unknown                            | TCANTNN          | 3.36E-70   | -1.60E+02   | 50000      | 13334       | 25602      | 7700                           |
| REL class/REL                          | GGGGATTTC        | 6.39E-70   | -1.59E+02   | 50000      | 13334       | 934        | 502                            |
| Tcfcp2l1/mES-Tcfcp2l1-ChIP-Seq/Homer   | NAAACCGTTTNAACI  | 1.83E-69   | -1.58E+02   | 50000      | 13334       | 26134      | 7836                           |
| dl_1/REL                               | GGGGTTTTTCN      | 1.03E-66   | -1.52E+02   | 50000      | 13334       | 16023      | 5075                           |
| NF-kappaB/REL                          | GGGAATTC         | 4.31E-65   | -1.48E+02   | 50000      | 13334       | 1137       | 570                            |
| Su(H)/IPT/TIG domain                   | NTGTGGGAAACGAGA  | 7.70E-65   | -1.48E+02   | 50000      | 13334       | 25957      | 7759                           |
| REL/REL                                | GGGGNTTTC        | 2.32E-64   | -1.47E+02   | 50000      | 13334       | 19871      | 6121                           |
| ZNF354C/ZNF-FINGER, C2H2               | ATCCAC           | 2.79E-64   | -1.46E+02   | 50000      | 13334       | 22337      | 6789                           |
| NFKB(p65,Rel)/LPS-exp/Homer            | GGAAATTC         | 1.10E-63   | -1.45E+02   | 50000      | 13334       | 10618      | 3523                           |
| NFKB(p50,p52)/p50-ChIP-Seq/Homer       | GGGGAAATCCCC     | 3.91E-63   | -1.44E+02   | 50000      | 13334       | 25966      | 7750                           |
| DL_2/REL                               | GGGGATTTC        | 5.25E-63   | -1.43E+02   | 50000      | 13334       | 19937      | 6130                           |
| Znf263/K562-Znf263-ChIP-Seq/Homer      | CNGTCCTCC        | 1.02E-61   | -1.40E+02   | 50000      | 13334       | 26112      | 7779                           |
| NFKB1/REL                              | GGGGATTC         | 1.11E-61   | -1.40E+02   | 50000      | 13334       | 23531      | 7092                           |
| ERE(IR3)/MCF7-ERA-ChIP-Seq/Homer       | NAGGTCAcNNTGACC  | 5.47E-61   | -1.39E+02   | 50000      | 13334       | 26044      | 7756                           |
| Tlx/NPC-H3K4me1-ChIP-Seq/Homer         | CTGGCAGNCTGCCA   | 7.23E-61   | -1.39E+02   | 50000      | 13334       | 24837      | 7435                           |
| DCE_S_III/Unknown                      | NAGCN            | 2.22E-60   | -1.37E+02   | 50000      | 13334       | 26056      | 7755                           |
| E2A/proBcell-E2A-ChIP-Seq/Homer        | NNACAGCTGC       | 2.84E-57   | -1.30E+02   | 50000      | 13334       | 25866      | 7683                           |
| Arnt/bHLH                              | CACGTG           | 3.94E-57   | -1.30E+02   | 50000      | 13334       | 21582      | 6536                           |
| Srebp2/HepG2-Srebp2-ChIP-Seq/Homer     | CNGTCAGCCAC      | 5.57E-56   | -1.27E+02   | 50000      | 13334       | 25335      | 7533                           |

|                                          |                  |          |           |       |       |       |      |
|------------------------------------------|------------------|----------|-----------|-------|-------|-------|------|
| bZIP CREB/G-box-like subclass/bZIP       | TGACGT           | 9.69E-56 | -1.27E+02 | 50000 | 13334 | 7398  | 2536 |
| TGA1a/bZIP                               | TACGTCA          | 5.64E-55 | -1.25E+02 | 50000 | 13334 | 26034 | 7711 |
| ABI4/AP2                                 | CGGTGCCCCC       | 2.88E-53 | -1.21E+02 | 50000 | 13334 | 26017 | 7694 |
| TLX1-NFIC/HOMEO/CAAT                     | TGGACCATGCCAA    | 1.21E-52 | -1.20E+02 | 50000 | 13334 | 25506 | 7554 |
| KIF4/ZN-FINGER, C2H2                     | TAAAGGAAAGG      | 3.35E-52 | -1.19E+02 | 50000 | 13334 | 20080 | 6093 |
| KIF4/mES-KIF4-ChIP-Seq/Homer             | GCCACACCA        | 4.62E-52 | -1.18E+02 | 50000 | 13334 | 21160 | 6385 |
| ESR1/NUCLEAR RECEPTOR                    | CCAGGTACCCTGACC  | 2.99E-50 | -1.14E+02 | 50000 | 13334 | 25936 | 7650 |
| Pax5/PAIRED                              | NGNGCACTGAAGCGT  | 6.12E-50 | -1.13E+02 | 50000 | 13334 | 25990 | 7662 |
| XCPE1/Unknown                            | GGGGGGGACC       | 5.06E-48 | -1.09E+02 | 50000 | 13334 | 25959 | 7639 |
| CTCF-SatelliteElement/CD4+-CTCF-ChIP-Seq | TGCAGTTCNNNNNTT  | 1.61E-47 | -1.08E+02 | 50000 | 13334 | 25970 | 7638 |
| IRF2/TRP-CLUSTER                         | GGAAAGCGAAACCAA  | 6.63E-47 | -1.06E+02 | 50000 | 13334 | 25400 | 7482 |
| MZF1_5-13/ZN-FINGER, C2H2                | GGAGGGGGAA       | 2.78E-46 | -1.05E+02 | 50000 | 13334 | 25950 | 7623 |
| Stat3/mES-Stat3-ChIP-Seq/Homer           | CTTCNGGAA        | 4.26E-46 | -1.05E+02 | 50000 | 13334 | 25733 | 7564 |
| TFAP2A/AP2                               | GCCNNNGGG        | 2.04E-45 | -1.03E+02 | 50000 | 13334 | 25874 | 7596 |
| FOXO1/FORKHEAD                           | NNNNAGTA         | 2.87E-45 | -1.03E+02 | 50000 | 13334 | 10572 | 3396 |
| PPARG/NUCLEAR RECEPTOR                   | GTAGGTCACTGACC   | 1.43E-44 | -1.01E+02 | 50000 | 13334 | 25768 | 7561 |
| NRF1/MCF7-NRF1-ChIP-Seq/Homer            | CTGCGCATGCGC     | 7.36E-43 | -9.70E+01 | 50000 | 13334 | 25715 | 7533 |
| MTE/Unknown                              | TTTCGAGCGGAACGGT | 1.58E-42 | -9.63E+01 | 50000 | 13334 | 24406 | 7182 |
| SP1/ZN-FINGER, C2H2                      | GGGGGGGGT        | 2.98E-40 | -9.10E+01 | 50000 | 13334 | 25839 | 7544 |
| BREu/Unknown                             | AGCGCGCC         | 4.38E-40 | -9.06E+01 | 50000 | 13334 | 24288 | 7130 |
| Sp1/Promoter/Homer                       | GGCCCGCCCC       | 4.69E-38 | -8.60E+01 | 50000 | 13334 | 25609 | 7464 |
| MEF2A/MADS                               | CTATTTATAG       | 9.14E-38 | -8.53E+01 | 50000 | 13334 | 847   | 399  |
| REST/ZN-FINGER, C2H2                     | GCGCTGTCCATGGTGC | 5.54E-37 | -8.35E+01 | 50000 | 13334 | 25709 | 7481 |
| ENBP1/bZIP                               | ACACGTGG         | 8.27E-37 | -8.31E+01 | 50000 | 13334 | 15937 | 4836 |
| IRF1/TRP-CLUSTER                         | GAAAGCGAAACC     | 4.65E-36 | -8.14E+01 | 50000 | 13334 | 1676  | 679  |
| DPE/Unknown                              | NAAGATGTN        | 4.82E-36 | -8.13E+01 | 50000 | 13334 | 25116 | 7315 |
| RORA_2/NUCLEAR RECEPTOR                  | NATAANTAGGTCAA   | 1.30E-35 | -8.03E+01 | 50000 | 13334 | 25601 | 7440 |
| EBF1/proBcell-Ebf1-ChIP-Seq/Homer        | GTCCCAGGGGA      | 2.42E-35 | -7.97E+01 | 50000 | 13334 | 25125 | 7311 |
| Staf/ZN-FINGER, C2H2                     | GATTTCCTAATGCC   | 3.85E-35 | -7.92E+01 | 50000 | 13334 | 25828 | 7496 |
| BREd/Unknown                             | GTNTNTN          | 1.50E-34 | -7.79E+01 | 50000 | 13334 | 25408 | 7379 |
| Foxa2/FORKHEAD                           | CAATATTTACTT     | 2.61E-34 | -7.73E+01 | 50000 | 13334 | 18918 | 5631 |
| HMG-1/HMG                                | GTGTANTC         | 2.24E-33 | -7.52E+01 | 50000 | 13334 | 17791 | 5315 |
| NRF1/Promoter/Homer                      | GTGCGCATGCGC     | 4.99E-33 | -7.44E+01 | 50000 | 13334 | 25552 | 7403 |
| E2F/Cell-Cycle-Exp/Homer                 | TTCCGCGAAAA      | 2.97E-31 | -7.03E+01 | 50000 | 13334 | 25503 | 7373 |
| Ar/NUCLEAR RECEPTOR                      | NTAAGAACANCNTGT  | 3.50E-31 | -7.01E+01 | 50000 | 13334 | 24942 | 7223 |
| Spz1/bHLH-ZIP                            | AGGGTAACAGC      | 7.88E-30 | -6.70E+01 | 50000 | 13334 | 25120 | 7257 |
| PEN2/bZIP                                | ACTTCTATT        | 1.06E-29 | -6.67E+01 | 50000 | 13334 | 25670 | 7402 |
| GLI3/GLI3-ChIP-Seq/Homer                 | CGTGGTGGTCC      | 2.93E-29 | -6.57E+01 | 50000 | 13334 | 24316 | 7037 |
| p53/mES-cMyc-ChIP-Seq/Homer              | ACATGCCCGGGCAT   | 4.37E-28 | -6.30E+01 | 50000 | 13334 | 25728 | 7401 |
| usp/NUCLEAR RECEPTOR                     | GGGGTCACGG       | 5.83E-27 | -6.04E+01 | 50000 | 13334 | 15435 | 4608 |
| Ddit3-Cebpa/bZIP                         | NNATGCAATCCC     | 1.12E-26 | -5.98E+01 | 50000 | 13334 | 25039 | 7203 |
| MED-1/Unknown                            | GCTCCG           | 1.56E-26 | -5.94E+01 | 50000 | 13334 | 25714 | 7381 |
| REST(NRSF)/Jurkat-NRSF-ChIP-Seq/Homer    | GGAGCTGTCCATGGTC | 1.99E-26 | -5.92E+01 | 50000 | 13334 | 25703 | 7377 |
| E2F1/E2F_TDP                             | TTTGCGCC         | 3.10E-26 | -5.87E+01 | 50000 | 13334 | 23775 | 6861 |
| AGL3/MADS                                | CCATAAATAG       | 2.24E-25 | -5.68E+01 | 50000 | 13334 | 956   | 402  |
| T1SRE/Ifnb-Exp/Homer                     | ACTTCTGTTTCT     | 7.15E-25 | -5.56E+01 | 50000 | 13334 | 25661 | 7349 |
| HMG-1Y/HMG                               | NAACAAATGGAAAAA  | 1.53E-24 | -5.48E+01 | 50000 | 13334 | 24833 | 7125 |
| CCAAT-box/Unknown                        | NNTAGCCAATCA     | 3.57E-24 | -5.40E+01 | 50000 | 13334 | 25679 | 7346 |
| MADS class/MADS                          | CCATATATGG       | 1.31E-23 | -5.27E+01 | 50000 | 13334 | 1712  | 642  |
| RXR(DR1)/3T3L1-RXR-ChIP-Seq/Homer        | TAGGGCAAAAGTCA   | 3.47E-23 | -5.17E+01 | 50000 | 13334 | 25604 | 7315 |
| PPARE(DR1)/3T3L1-Pparg-ChIP-Seq/Homer    | TGACCTTTGCCCCA   | 1.17E-22 | -5.05E+01 | 50000 | 13334 | 25612 | 7311 |
| Nuclear Receptor class/Nuclear receptor  | AGGTCA           | 7.22E-22 | -4.87E+01 | 50000 | 13334 | 15965 | 4700 |
| Agamous/MADS                             | CCAAATNNGGN      | 3.20E-21 | -4.72E+01 | 50000 | 13334 | 20208 | 5846 |
| NFY/Promoter/Homer                       | AGCCAATCGG       | 3.83E-20 | -4.47E+01 | 50000 | 13334 | 25349 | 7211 |
| GFY/Promoter/Homer                       | ATTCTCGGAGA      | 3.25E-19 | -4.26E+01 | 50000 | 13334 | 25306 | 7188 |
| X-box/NPC-H3K4me1-ChIP-Seq/Homer         | GGTGGCATGGCAA    | 3.53E-19 | -4.25E+01 | 50000 | 13334 | 25195 | 7158 |
| Roaz/ZN-FINGER, C2H2                     | GGCACCAGGGGTGC   | 1.47E-18 | -4.11E+01 | 50000 | 13334 | 25499 | 7231 |
| Sox17/HMG                                | NNCATTGTC        | 8.39E-18 | -3.93E+01 | 50000 | 13334 | 25551 | 7235 |
| HMG class/HMG                            | ATTGTT           | 2.01E-17 | -3.84E+01 | 50000 | 13334 | 21967 | 6272 |
| Hand1-Tcf2a/bHLH                         | NGTCTGGCAT       | 2.13E-17 | -3.84E+01 | 50000 | 13334 | 25485 | 7212 |
| Sox2/mES-Sox2-ChIP-Seq/Homer             | NCCATTGTC        | 1.07E-16 | -3.68E+01 | 50000 | 13334 | 24601 | 6967 |
| RREB1/ZN-FINGER, C2H2                    | CCCCAAACCCCCCCI  | 4.84E-16 | -3.53E+01 | 50000 | 13334 | 25269 | 7136 |
| LXRE(DR-4)/BLRP(RAW)-LXRb-ChIP-Seq/Homer | GGGTACTANAGGTC   | 9.10E-16 | -3.46E+01 | 50000 | 13334 | 24387 | 6897 |
| ZFX/mES-Zfx-ChIP-Seq/Homer               | AGGCCCTNG        | 1.62E-15 | -3.41E+01 | 50000 | 13334 | 23988 | 6788 |
| Pax6/PAIRED                              | TTACGCATGANTT    | 1.39E-13 | -2.96E+01 | 50000 | 13334 | 24837 | 6985 |
| SRE/PUER-Srf-ChIP-Seq/Homer              | CCATATATGGNA     | 2.12E-12 | -2.69E+01 | 50000 | 13334 | 9472  | 2797 |
| YY1/Promoter/Homer                       | CAAGATGGCGGC     | 1.59E-11 | -2.49E+01 | 50000 | 13334 | 25392 | 7100 |
| STAT1/HelaS3-STAT1-ChIP-Seq/Homer        | NATTTCCNGGAAAT   | 1.07E-10 | -2.30E+01 | 50000 | 13334 | 2161  | 707  |
| TAL1-TCF3/bHLH                           | NGACATCTGTT      | 1.38E-10 | -2.27E+01 | 50000 | 13334 | 24320 | 6798 |
| EN1/HOMEO                                | AAGTAGTGCC       | 7.26E-10 | -2.10E+01 | 50000 | 13334 | 6150  | 1839 |
| SRE/ThioMac-Srf-ChIP-Seq/Homer           | CCATATATGGNA     | 1.15E-09 | -2.06E+01 | 50000 | 13334 | 12617 | 3623 |
| NFIL3/bZIP                               | TTATGTAACNT      | 1.75E-09 | -2.02E+01 | 50000 | 13334 | 1006  | 353  |
| FOXO1/FORKHEAD                           | GNNTGTTGTTT      | 3.87E-09 | -1.94E+01 | 50000 | 13334 | 12840 | 3675 |
| RORA_1/NUCLEAR RECEPTOR                  | ATCAAGGTCA       | 5.34E-09 | -1.91E+01 | 50000 | 13334 | 6379  | 1892 |
| NFYA/CAAT-BOX                            | NNCAGCCAATCAGNGI | 6.56E-09 | -1.88E+01 | 50000 | 13334 | 357   | 145  |
| STAT5/mCD4+Stat5a b-ChIP-Seq/Homer       | NTTTCTNAGAAA     | 6.94E-08 | -1.65E+01 | 50000 | 13334 | 1294  | 430  |
| TP53/P53                                 | CCGGACATGCCCGGGI | 7.65E-08 | -1.64E+01 | 50000 | 13334 | 23734 | 6589 |
| PBF/ZN-FINGER, DOF                       | AAAGC            | 6.55E-07 | -1.42E+01 | 50000 | 13334 | 16856 | 4722 |
| MNB1A/ZN-FINGER, DOF                     | AAAGC            | 6.55E-07 | -1.42E+01 | 50000 | 13334 | 16856 | 4722 |
| Dof3/ZN-FINGER, DOF                      | AAAGCG           | 1.29E-06 | -1.36E+01 | 50000 | 13334 | 17417 | 4867 |
| Dof2/ZN-FINGER, DOF                      | AAAGCN           | 1.68E-06 | -1.33E+01 | 50000 | 13334 | 17386 | 4856 |
| TEAD1/TEA                                | CACATTCCTCNG     | 4.96E-06 | -1.22E+01 | 50000 | 13334 | 13776 | 3870 |
| Nanog/mES-Nanog-ChIP-Seq/Homer           | GGCCATTAAC       | 6.85E-06 | -1.19E+01 | 50000 | 13334 | 18423 | 5121 |
| SRY/HMG                                  | NTAAACAAT        | 2.21E-05 | -1.07E+01 | 50000 | 13334 | 94    | 44   |
| Broad-complex_4/ZN-FINGER, C2H2          | TAGTAAACAAA      | 4.92E-05 | -9.92E+00 | 50000 | 13334 | 243   | 93   |
| SQUA/MADS                                | CCAAAATGGAAA     | 1.37E-04 | -8.90E+00 | 50000 | 13334 | 1289  | 400  |
| Esrrb/mES-Esrrb-ChIP-Seq/Homer           | NTGACCTTGA       | 3.08E-04 | -8.08E+00 | 50000 | 13334 | 25156 | 6878 |
| SOX9/HMG                                 | GAACAATGG        | 7.18E-04 | -7.24E+00 | 50000 | 13334 | 279   | 99   |
| TBP/TATA-box                             | NTATAAAAAGNNNNNN | 9.53E-04 | -6.96E+00 | 50000 | 13334 | 420   | 141  |
| TATA-Box/Unknown                         | NTATAAAAAGNNNNNN | 9.53E-04 | -6.96E+00 | 50000 | 13334 | 420   | 141  |
| RXRA-VDR/NUCLEAR RECEPTOR                | GGGTCAACGAGTTCA  | 2.91E-03 | -5.84E+00 | 50000 | 13334 | 26    | 14   |
| Oct4/mES-Oct4-ChIP-Seq/Homer             | ATTGTCATAA       | 3.48E-03 | -5.66E+00 | 50000 | 13334 | 29    | 15   |
| NR3C1/NUCLEAR RECEPTOR                   | GGGAACATTATGTCTT | 5.18E-03 | -5.26E+00 | 50000 | 13334 | 25011 | 6797 |
| SRF/MADS                                 | GCCCATATATGG     | 7.63E-03 | -4.88E+00 | 50000 | 13334 | 48    | 21   |
